# Supplementary material for: 1,3-Bis(pyridineylidene)isoindoline: an isoindoline chelate with a stretched electronic structure
Source: Royal Society of Chemistry journal article supplement (doi:10.1039/d0dt04347h), 2020-12-23
Supplement: d0dt04347h1.pdf [file d0dt04347h1.pdf]

# **Bis(pyridineylidene)isoindoline, an isoindoline chelate with a delocalized electronic structure**

Sanjay Gaire,<sup>a</sup> Briana R. Schrage,<sup>a</sup> Victor N. Nemykin,<sup>b</sup> and Christopher J. Ziegler<sup>a</sup>

*a* Department of Chemistry, University of Akron, Akron, Ohio 44312-3601, United States

*b* Department of Chemistry, University of Tennessee, Knoxville, TN 37996

## **Supplementary Information**

## Table of Contents

|                                                                                                                                                            | Page |
|------------------------------------------------------------------------------------------------------------------------------------------------------------|------|
| General Information                                                                                                                                        | S4   |
| Full citation for Gaussian                                                                                                                                 | S6   |
| Syntheses                                                                                                                                                  | S7   |
| <b>Figure S1:</b> $^1\text{H}$ NMR (300 MHz) of <b>1</b> in $\text{CDCl}_3$ .                                                                              | S9   |
| <b>Figure S2:</b> $^1\text{H}$ NMR (300 MHz) of <b>Zn(1)</b> in $\text{CDCl}_3$ .                                                                          | S10  |
| <b>Figure S3:</b> High-resolution ESI mass spectra of <b>1</b> .                                                                                           | S11  |
| <b>Figure S4:</b> High-resolution ESI mass spectra of <b>Zn(1)</b> .                                                                                       | S12  |
| <b>Figure S5:</b> High-resolution ESI mass spectra of <b>Cu(1)</b> .                                                                                       | S13  |
| <b>Figure S6:</b> High-resolution ESI mass spectra of <b>Ni(1)</b> .                                                                                       | S14  |
| <b>Figure S7:</b> Cyclic voltammogram of compound <b>1</b> in DMF/0.1 TBAPF <sub>6</sub>                                                                   | S15  |
| <b>Figure S8:</b> Cyclic voltammogram of compound <b>Zn(1)</b> in DMF/0.1 TBAPF <sub>6</sub>                                                               | S16  |
| <b>Figure S9:</b> Cyclic voltammogram of compound <b>Cu(1)</b> in DMF/0.1 TBAPF <sub>6</sub>                                                               | S17  |
| <b>Figure S10:</b> Cyclic voltammogram of compound <b>Ni(1)</b> in DMF/0.1 TBAPF <sub>6</sub>                                                              | S18  |
| <b>Figure S11:</b> The UV-visible spectra of BPYI and its metal complexes in DMF solution.                                                                 | S19  |
| <b>Figure S12:</b> DFT-predicted frontier orbitals for BPYI ( <b>1</b> ) and BPI.                                                                          | S20  |
| <b>Figure S13:</b> DFT-predicted frontier orbitals for the metal complexes of ( <b>1</b> ).                                                                | S21  |
| <b>Figure S14:</b> Experimental and TDDFT-predicted spectra for compounds BPYI ( <b>1</b> ) and BPI                                                        | S22  |
| <b>Figure S14:</b> Experimental and TDDFT-predicted spectra for compounds <b>Zn(1)</b> .                                                                   | S23  |
| <b>Figure S15:</b> Experimental and TDDFT-predicted spectra for compounds <b>Cu(1)</b> and <b>Ni(1)</b> .                                                  | S24  |
| <b>Figure S17:</b> B3LYP relative energies of the frontier orbitals for BPYI ( <b>1</b> ) and BPI.                                                         | S25  |
| <b>Figure S16:</b> B3LYP $\alpha$ -spin relative energies of the frontier orbitals for compounds <b>1</b> , <b>Zn(1)</b> , <b>Cu(1)</b> and <b>Ni(1)</b> . | S26  |
| <b>Figure S17:</b> B3LYP $\beta$ -spin relative energies of the frontier orbitals for compounds <b>1</b> , <b>Zn(1)</b> , <b>Cu(1)</b> and <b>Ni(1)</b> .  | S26  |
| <b>Figure S18:</b> Orbital compositions for <b>1</b> and <b>Zn(1)</b> .                                                                                    | S27  |
| <b>Figure S19:</b> Orbital compositions for <b>Cu(1)</b> , $\alpha$ -spin on top and $\beta$ -spin on bottom.                                              | S28  |
| <b>Figure S20:</b> Orbital compositions for <b>Ni(1)</b> , $\alpha$ -spin on top and $\beta$ -spin on bottom.                                              | S29  |
| <b>Table S1:</b> X-ray crystal data and structure parameters                                                                                               | S30  |

for compounds **1**, **Zn(1)**, **Cu(1)**, and **Ni(1)**.

|                                                                                                                                                                            |     |
|----------------------------------------------------------------------------------------------------------------------------------------------------------------------------|-----|
| <b>Table S2:</b> Evans NMR method data and parameters.                                                                                                                     | S32 |
| <b>Table S3:</b> TDDFT-predicted energies and expansion coefficients for compound <b>1</b><br>(only excited states with $f > 0.05$ and $\lambda > 270$ nm are listed).     | S33 |
| <b>Table S4:</b> TDDFT-predicted energies and expansion coefficients for compound <b>BPI</b><br>(only excited states with $f > 0.05$ and $\lambda > 270$ nm are listed).   | S33 |
| <b>Table S5:</b> TDDFT-predicted energies and expansion coefficients for compound <b>Zn(1)</b><br>(only excited states with $f > 0.05$ and $\lambda > 270$ nm are listed). | S33 |
| <b>Table S6:</b> TDDFT-predicted energies and expansion coefficients for compound <b>Cu(1)</b><br>(only excited states with $f > 0.05$ and $\lambda > 270$ nm are listed). | S33 |
| <b>Table S7:</b> TDDFT-predicted energies and expansion coefficients for compound <b>Ni(1)</b><br>(only excited states with $f > 0.05$ and $\lambda > 270$ nm are listed). | S36 |
| <b>Table S8:</b> DFT optimized geometry of compound <b>1</b> .                                                                                                             | S38 |
| <b>Table S9:</b> DFT optimized geometry of compound <b>BPI</b> .                                                                                                           | S39 |
| <b>Table S10:</b> DFT optimized geometry of compound <b>Zn(1)</b> .                                                                                                        | S40 |
| <b>Table S11:</b> DFT optimized geometry of compound <b>Cu(1)</b> .                                                                                                        | S42 |
| <b>Table S12:</b> DFT optimized geometry of compound <b>Ni(1)</b> .                                                                                                        | S44 |

## General Information

### Experimental

All reagents and starting materials were purchased from commercial vendors and used without further purification. 1,3-diiminoisoindoline (DII) was synthesized according to previously published procedures.<sup>1</sup> Deuterated solvents were purchased from Cambridge Isotope Laboratories and used as received.

NMR spectra were recorded on 300 MHz and 500 MHz spectrometers and chemical shifts were given in ppm relative to residual solvent resonances (<sup>1</sup>H NMR and <sup>13</sup>C NMR spectra). High-resolution mass spectrometry experiments were performed on a Bruker MicroTOF-III and MicroTOF-qIII instruments. Infrared spectra were collected on Thermo Scientific Nicolet iS5 that was equipped with an iD5 ATR. UV-visible spectra were recorded on a Shimadzu UV-2600 UV-Visible spectrophotometer.

X-ray intensity data were measured on a Bruker CCD-based and PHOTON II CPAD-based diffractometer with dual Cu/Mo ImuS microfocus optics (Cu K $\alpha$  radiation,  $\lambda = 1.54178 \text{ \AA}$ , Mo K $\alpha$  radiation,  $\lambda = 0.71073 \text{ \AA}$ ). Crystals were mounted on a cryoloop using Paratone oil and placed under a stream of nitrogen at 100 K (Oxford Cryosystems). The detector was placed at a distance of 5.00 cm from the crystal. The data were corrected for absorption with the SADABS program. The structures were refined using the Bruker SHELXTL Software Package (Version 6.1),<sup>2</sup> and were solved using direct methods until the final anisotropic full-matrix, least squares refinement of F<sup>2</sup> converged.

Electrochemistry measurements were conducted using a CHI 820D potentiostat in a standard three-electrode configuration. Platinum wire was used as the counter electrode. The working electrode used was a 2 mm diameter platinum disk. A nonaqueous Ag/Ag<sup>+</sup> reference

electrode was used by immersing silver wire in a degassed dimethylformamide (DMF) solution of 0.01 M  $\text{AgNO}_3$  /0.1 M tetrabutylammonium hexafluorophosphate ( $\text{TBAPF}_6$ ). All potentials were referenced to the ferrocene/ferrocenium couple. The concentration of analyte was 1.0 mM, and the supporting electrolyte was 0.1 M  $\text{TBAPF}_6$  dissolved in DMF.

## Computational Details

The starting geometries of compounds **BPI**, **1**, **Zn(1)**, **Cu(1)**, and **Ni(1)** were optimized using a B3LYP exchange–correlation functional.<sup>3</sup> Energy minima in optimized geometry were confirmed by the frequency calculations (absence of the imaginary frequencies). The solvent effect was modeled using the polarized continuum model (PCM).<sup>4</sup> In all calculations, DMF was used as the solvent (CHCl<sub>3</sub> for BPI). In PCM-TDDFT calculation, the first 30 states were calculated. All atoms were modeled using the 6-311G(d)<sup>5</sup> basis set. Gaussian 09 software was used in all calculations.<sup>6</sup> The QM Forge program was used for molecular orbital analysis in all cases.<sup>7</sup>

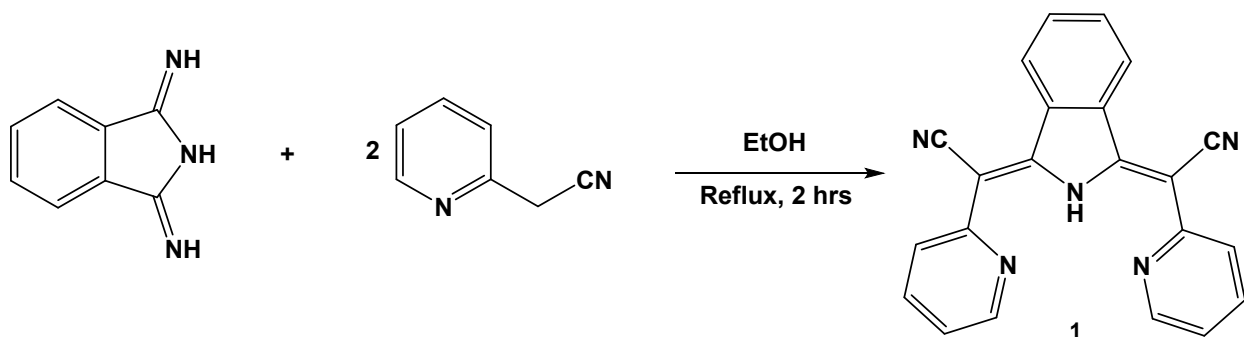

Synthesis of **1**: 1.00 g of DII (7 mmol), and 1.6 mL of 2-pyridylacetonitrile (14 mmol) were mixed in 30 mL of EtOH and refluxed for 2 hours. After cooling to room temperature, the precipitate was filtered, washed with cold EtOH, and dried in a vacuum oven, yielding an orange solid. Yield: 1.75 g (72%). MP: (decomp) 280°C. ESI MS (positive mode)  $[C_{22}H_{13}N_5Na]^+$  calculated  $[M+Na]^+$  370.1063 m/z, found 370.1021 m/z.  $^1H$  NMR (300 MHz,  $CDCl_3$ ):  $\delta$  = 7.25 (m, 2H), 7.67 (m, 2H), 7.82 (dd, 4H), 8.73 (m, 2H) and 8.81 (dd, 2H).  $^{13}C$  NMR  $\{^1H\}$ : due to limited solubility we were unable to get  $^{13}C$  NMR. Crystals suitable for X-ray diffraction were grown in DMF.

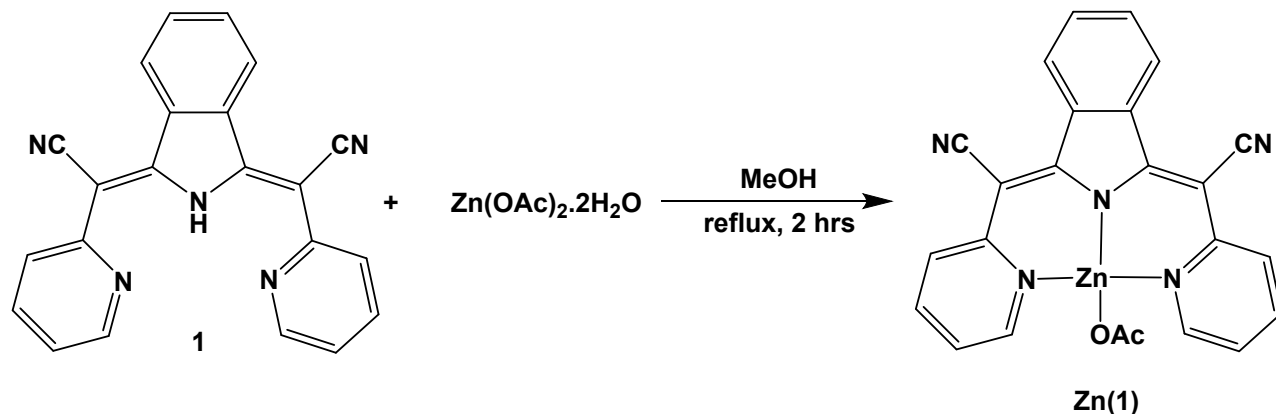

Synthesis of **Zn(1)**: 50.80 mg of **1** (146.24  $\mu$ mol), and 32.80 mg (146.24  $\mu$ mol) of  $Zn(OAc)_2 \cdot 2H_2O$  were dissolved in MeOH (20 mL) and refluxed for 2 hours. The resulting solution was cooled down to room temperature, filtered, washed with cold MeOH and dried in vacuum oven to get reddish brown powder of pure compound **2**. Yield: 68 mg (87%). ESI MS (positive mode)  $[C_{24}H_{15}N_5O_2ZnNa]^+$  calculated  $[M+Na]^+$  492.0420 m/z, found 492.0421 m/z.  $^1H$  NMR (300 MHz,  $CDCl_3$ ):  $\delta$  = 1.99 (s, 3H), 7.35 (m, 2H), 7.65 (m, 2H), 7.91 (m, 2H), 8.13 (m, 2H), 8.75 (m, 2H), 8.91 (m, 2H).  $^{13}C$  NMR  $\{^1H\}$ : due to limited solubility we were unable to get  $^{13}C$  NMR. Crystals suitable for X-ray diffraction were grown in chloroform.

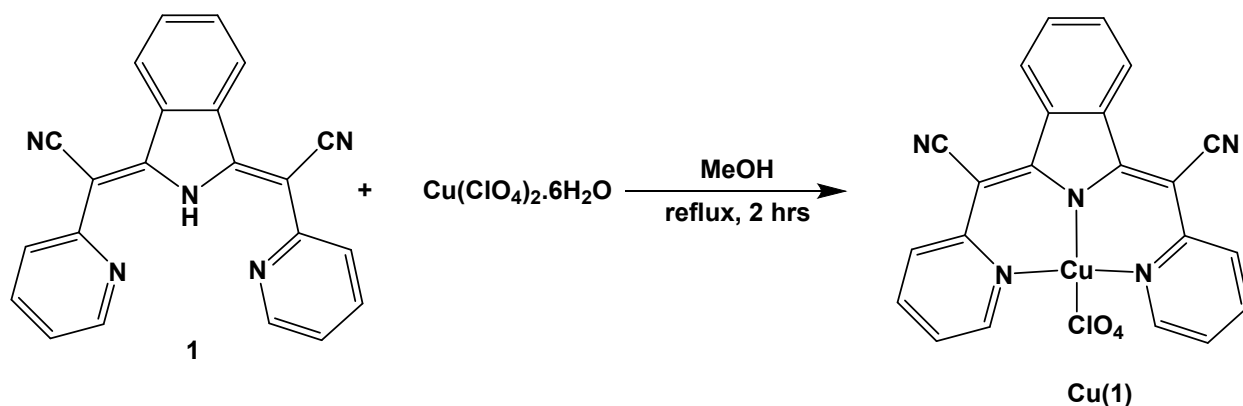

Synthesis of **Cu(1)**: 50 mg of **1** (143.93  $\mu\text{mol}$ ) and 53.33 mg (143.93  $\mu\text{mol}$ ) of  $\text{Cu}(\text{ClO}_4)_2 \cdot 6\text{H}_2\text{O}$  were dissolved in MeOH (20 mL) and refluxed for 2 hours. The resulting solution was cooled down to room temperature, filtered, washed with cold MeOH and dried in a vacuum oven to get brown powder of pure compound **Cu(1)**. Yield: 41 mg (56%). ESI MS (negative mode)  $[\text{C}_{22}\text{H}_{12}\text{Cl}_2\text{CuN}_5\text{O}_8]^-$  calculated  $[\text{M}]^-$  606.936 m/z, found 606.935 m/z.  $^1\text{H}$  NMR: due to paramagnetic nature we were unable to get  $^1\text{H}$  NMR. Crystals suitable for X-ray diffraction were grown in DMF.

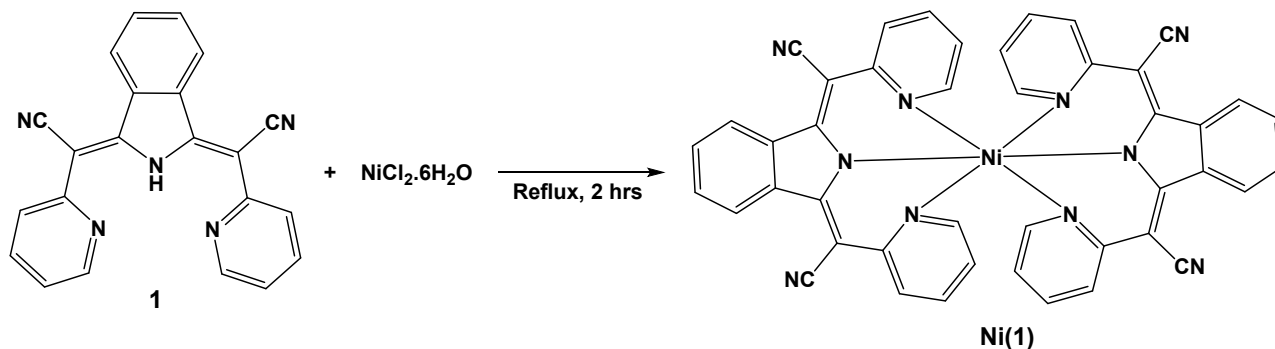

Synthesis of **Ni(1)**: Two equivalents of **1** (75 mg, 215.90  $\mu\text{mol}$ ) and one equivalent of  $\text{NiCl}_2 \cdot 6\text{H}_2\text{O}$  (107.95  $\mu\text{mol}$ , 25.66 mg) were dissolved in DMF (20 mL) and refluxed for 2 hours. The resulting solution was cooled down to room temperature left to evaporate to form dark red crystals of compound **Ni(1)**. Yield: 64 mg (79%). ESI MS (negative mode)  $[\text{C}_{44}\text{H}_{23}\text{N}_{10}\text{NiNa}]^-$  calculated  $[\text{M}+\text{Na}-\text{H}]^-$  772.1364 m/z, found 772.1430 m/z.  $^1\text{H}$  NMR: due to paramagnetic nature we were unable to get  $^1\text{H}$  NMR. Crystals suitable for X-ray diffraction were grown in DMF.



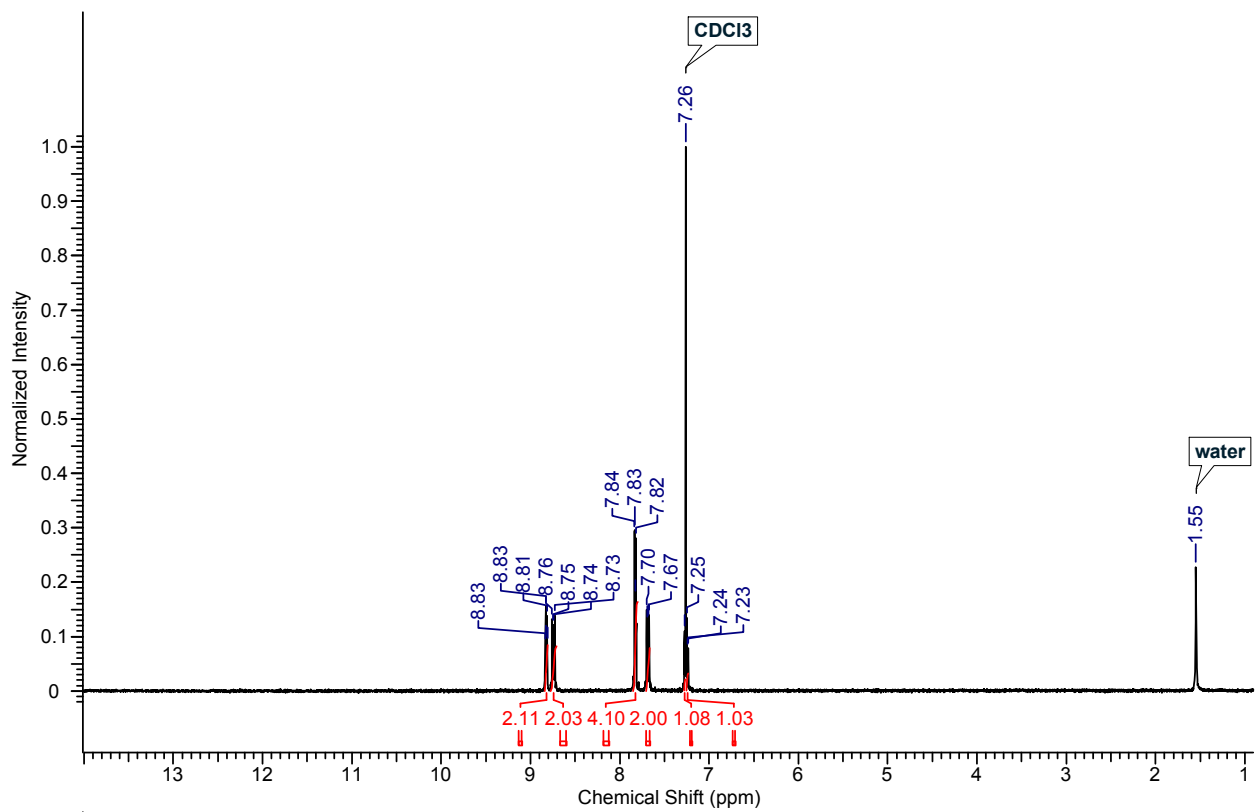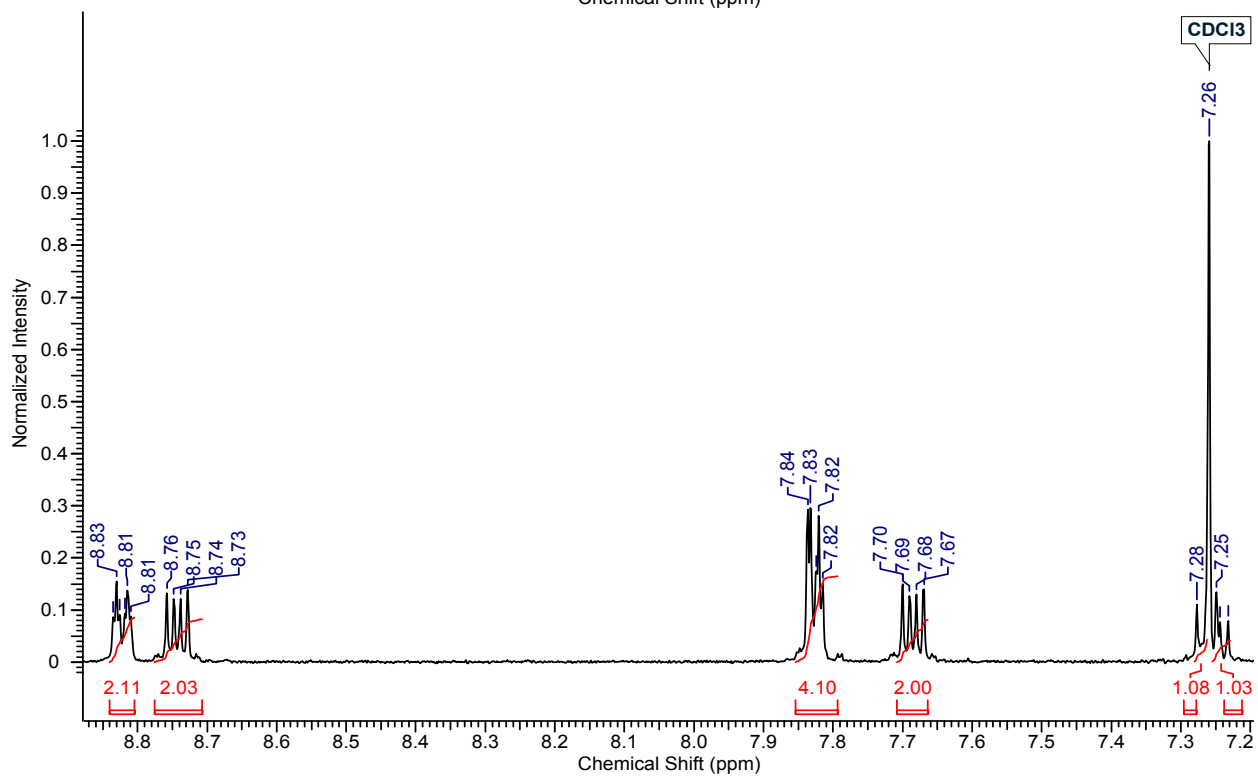

Figure S1: <sup>1</sup>H NMR (300 MHz) of **1** in CDCl<sub>3</sub>

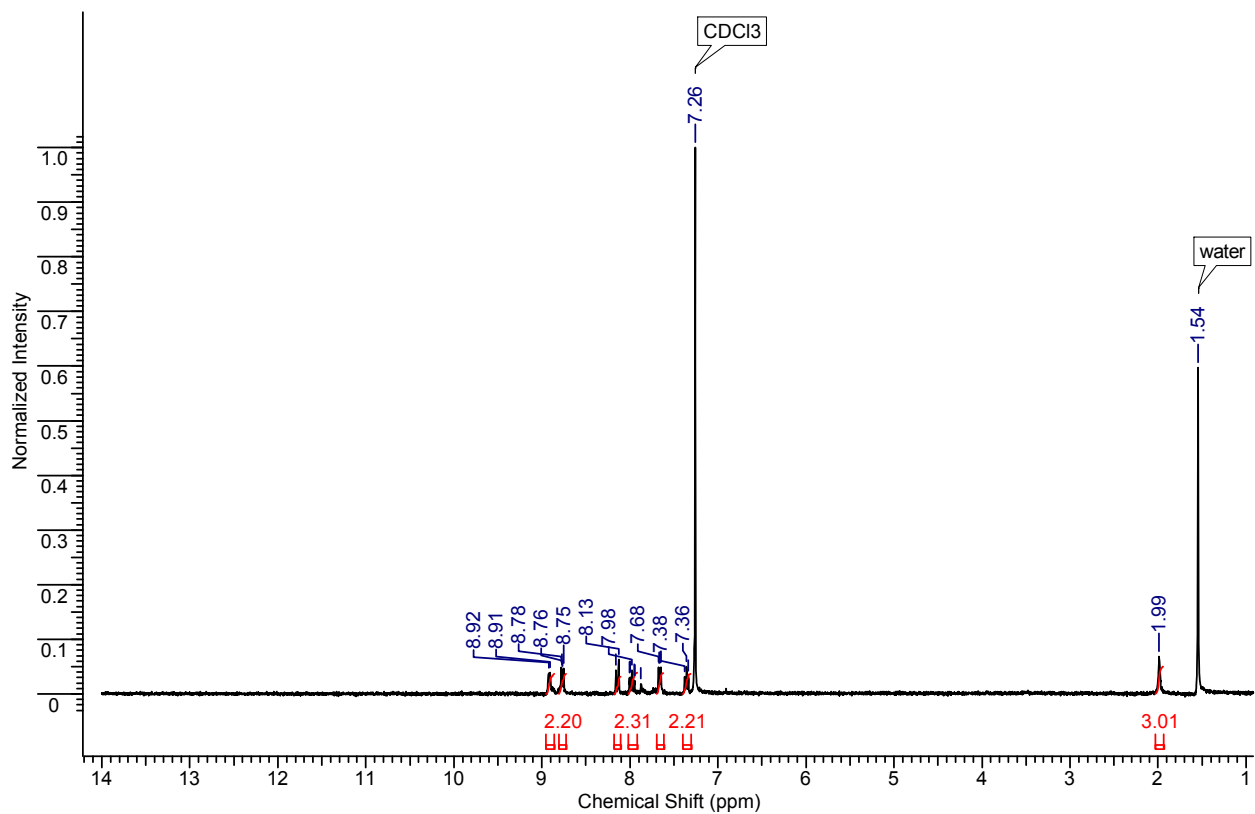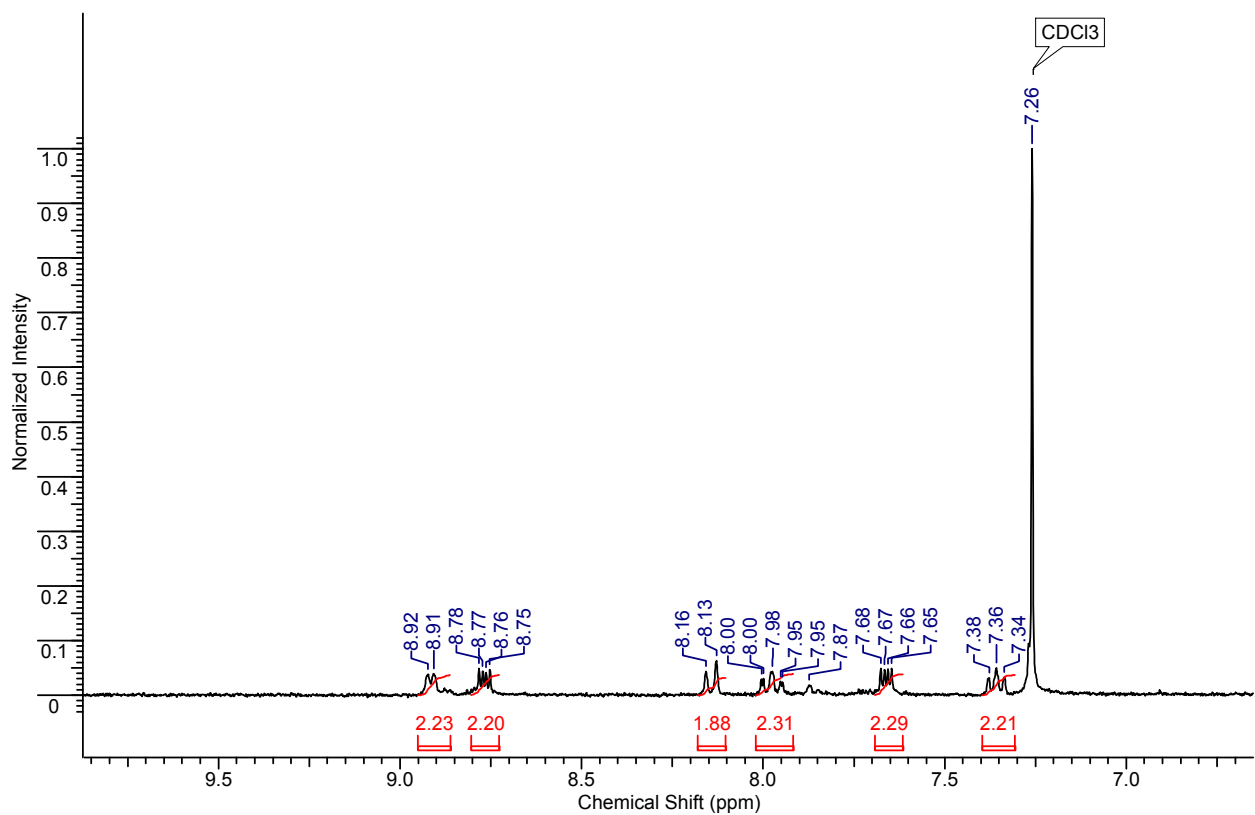

Figure S2: <sup>1</sup>H NMR (300 MHz) of Zn(1) in CDCl<sub>3</sub>

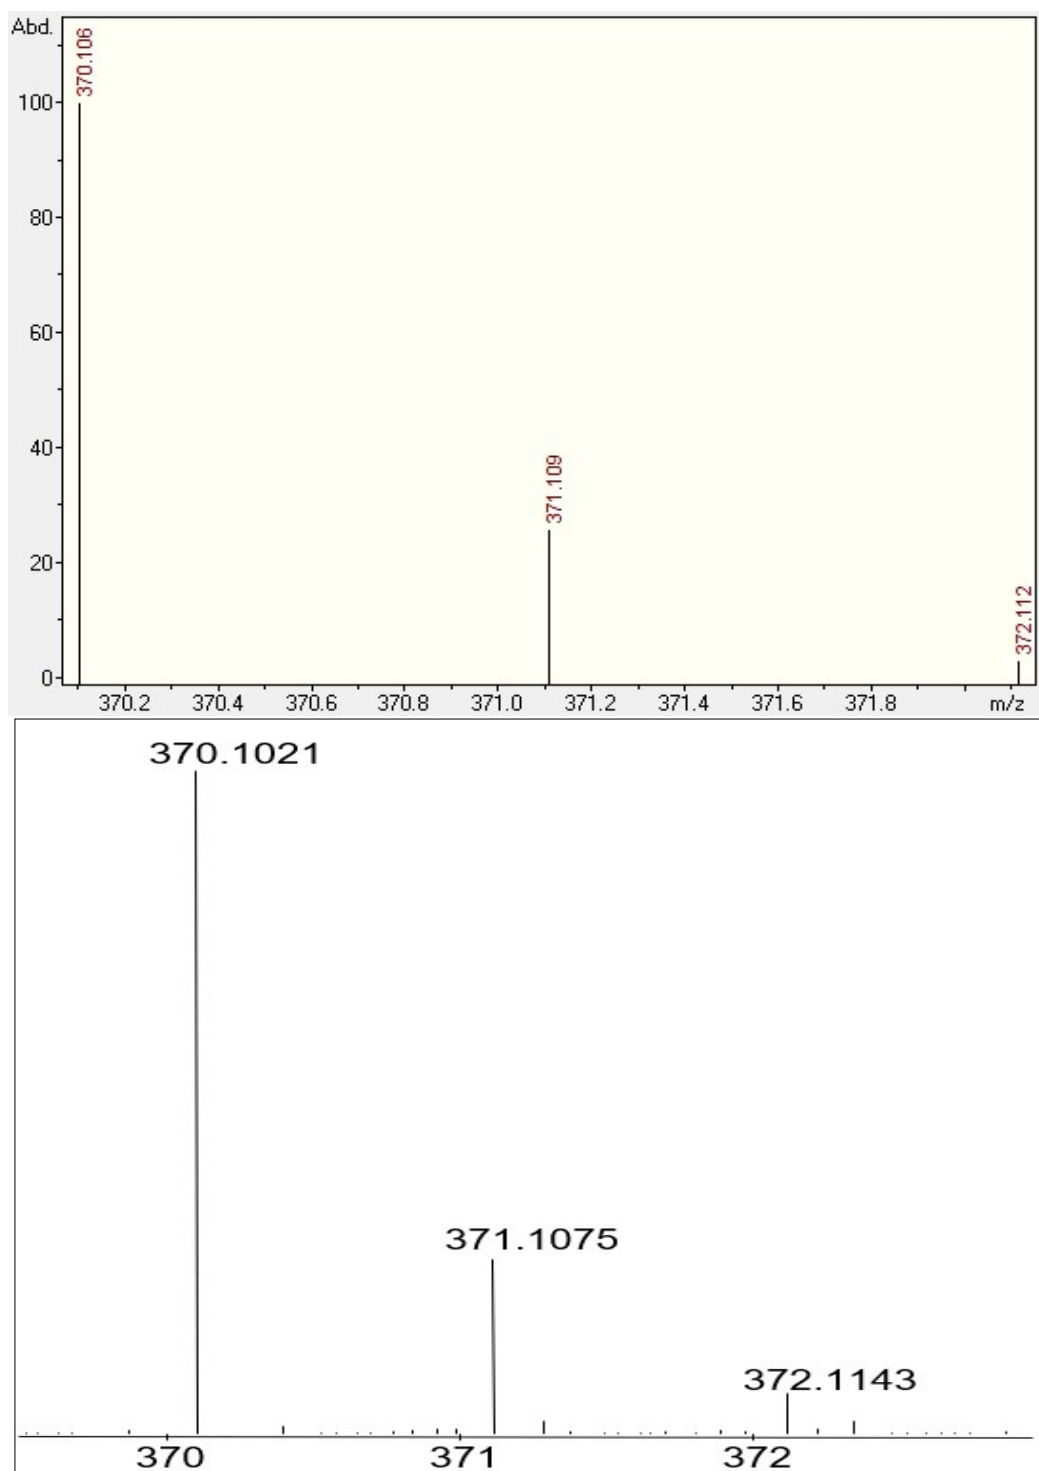

**Figure S3:** ESI mass spectra of **1**. Top: calculated spectrum. Bottom: experimental spectrum.

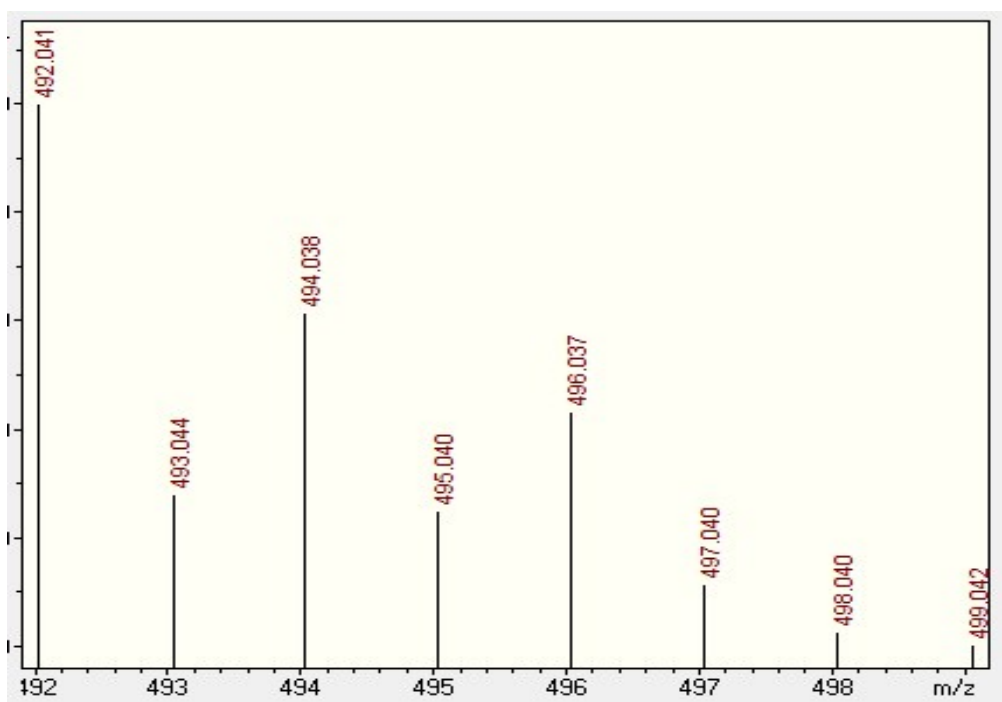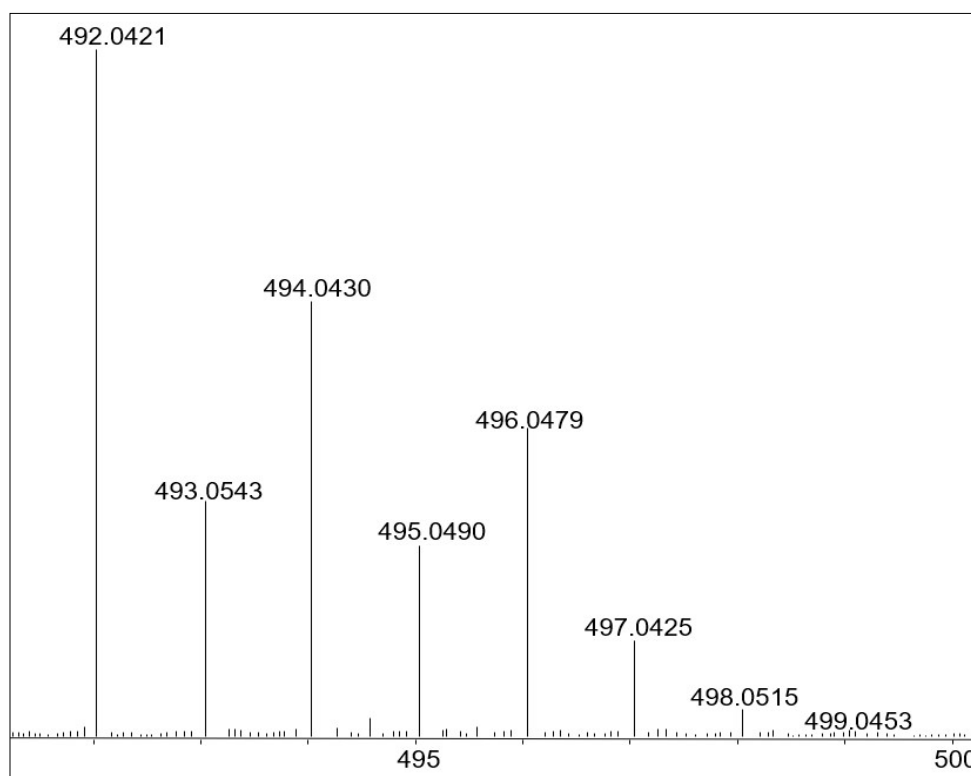

**Figure S4:** ESI mass spectra of **Zn(1)**. Top: calculated spectrum. Bottom: experimental spectrum.

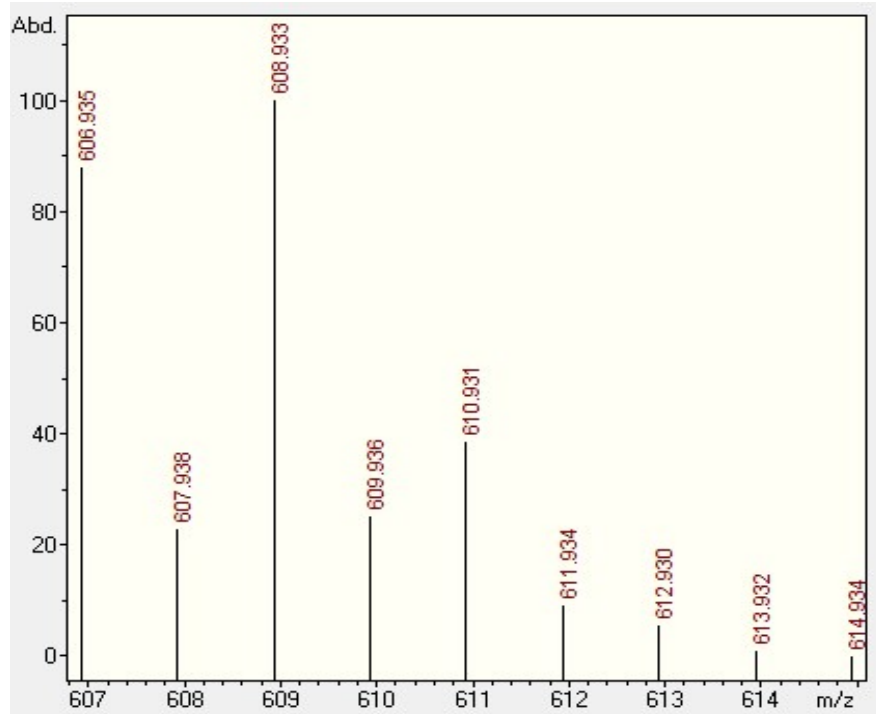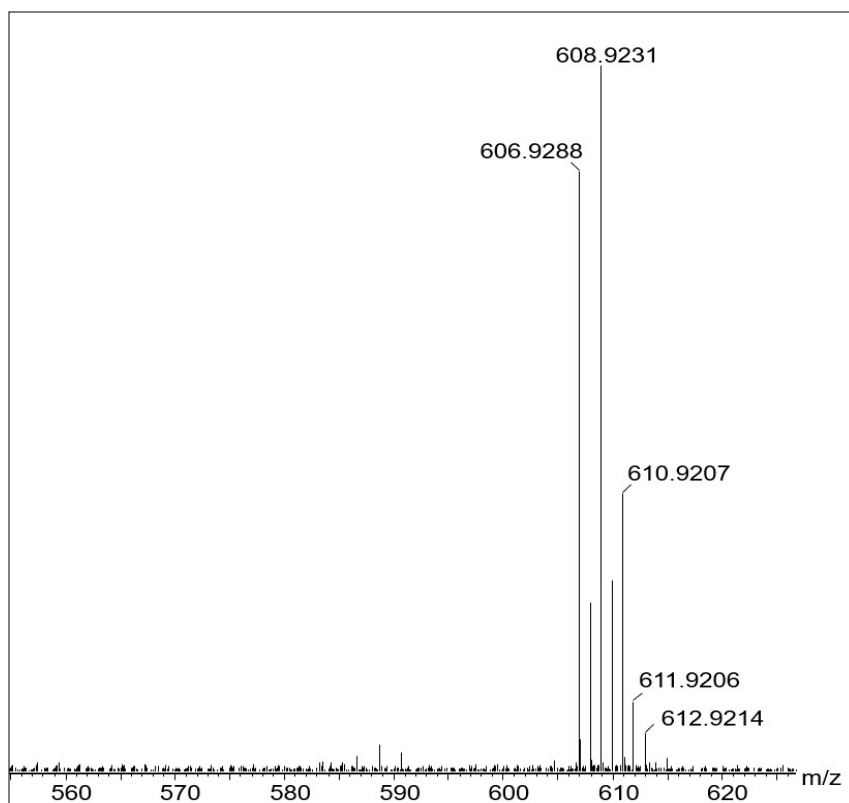

**Figure S5:** ESI mass spectra of **Cu(1)**. Top: calculated spectrum. Bottom: experimental spectrum.

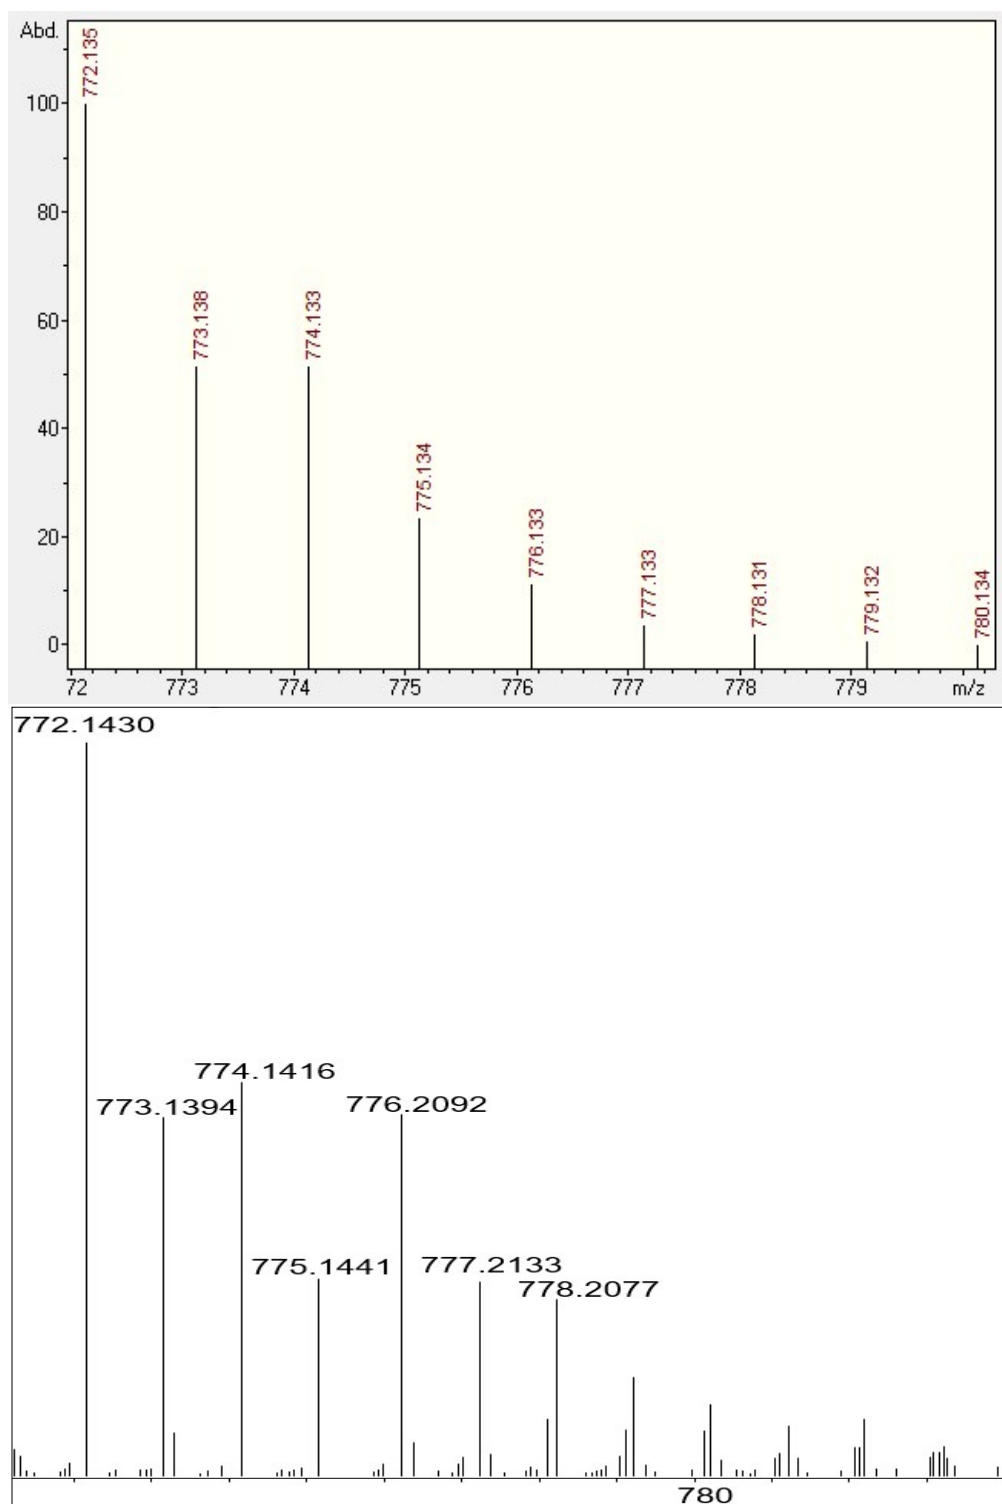

**Figure S6:** ESI mass spectra of Ni(1). Top: calculated spectrum. Bottom: experimental spectrum.

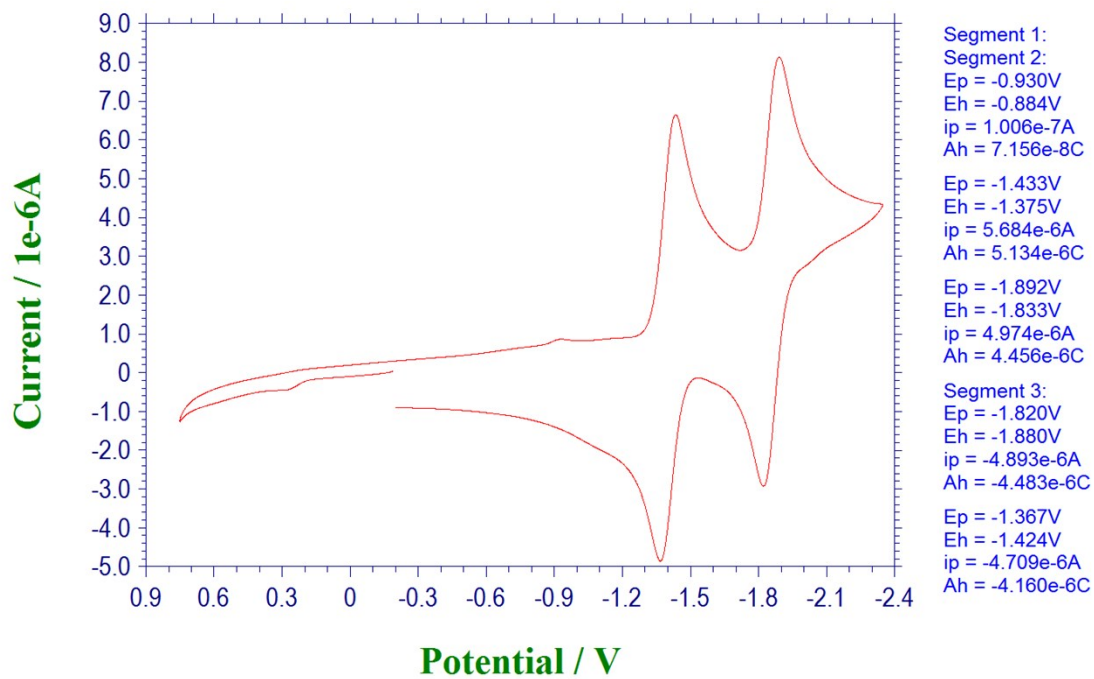

**Figure S7:** Cyclic voltammogram of compound **1** in DMF/0.1 TBAPF<sub>6</sub> (scan toward positive potentials).

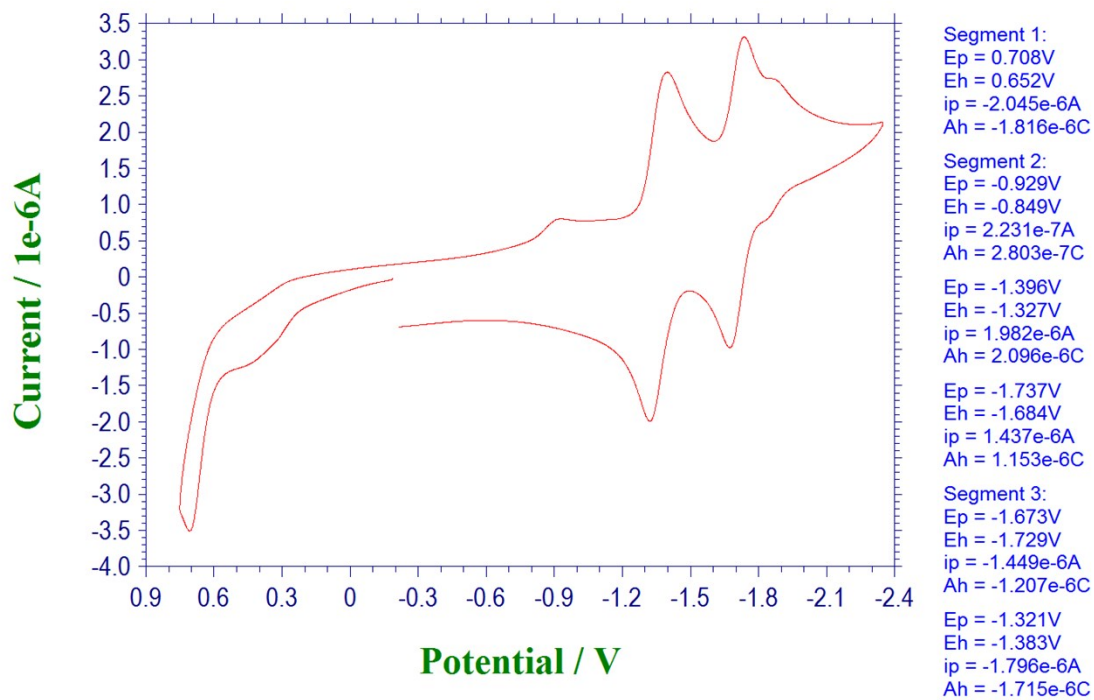

**Figure S8:** Cyclic voltammogram of compound **Zn(1)** in DMF/0.1 TBAPF<sub>6</sub> (scan toward positive potentials).



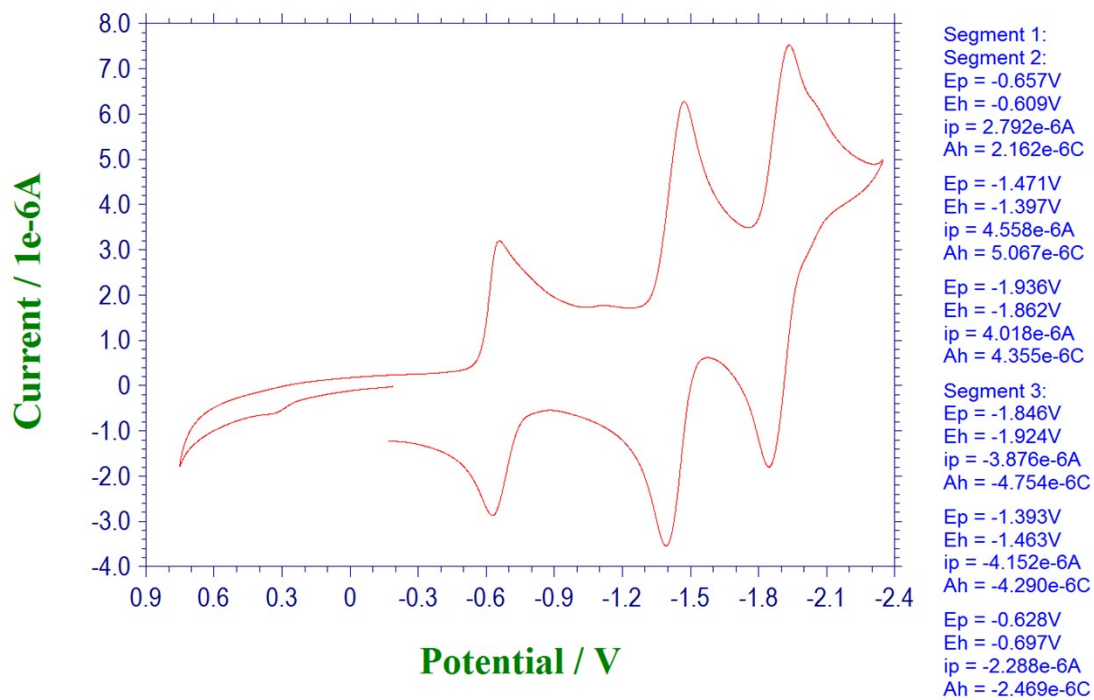

**Figure S9:** Cyclic voltammogram of compound **Cu(1)** in DMF/0.1 TBAPF<sub>6</sub>. (scan toward positive potentials).

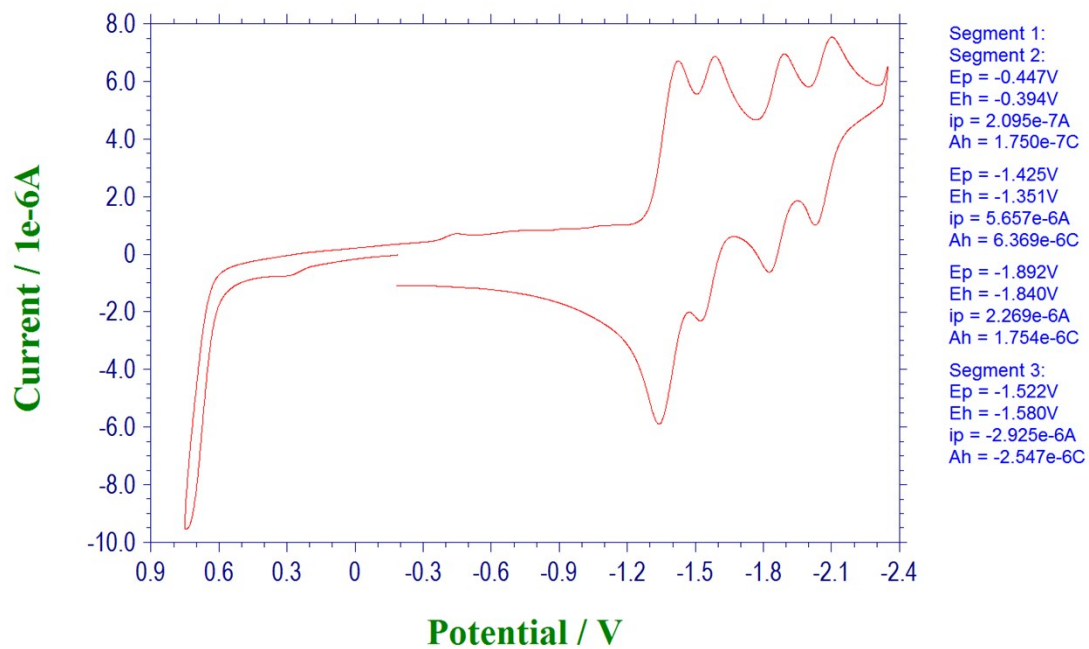

**Figure S10:** Cyclic voltammogram of compound **Ni(1)** in DMF/0.1 TBAPF<sub>6</sub> (scan toward positive potentials).

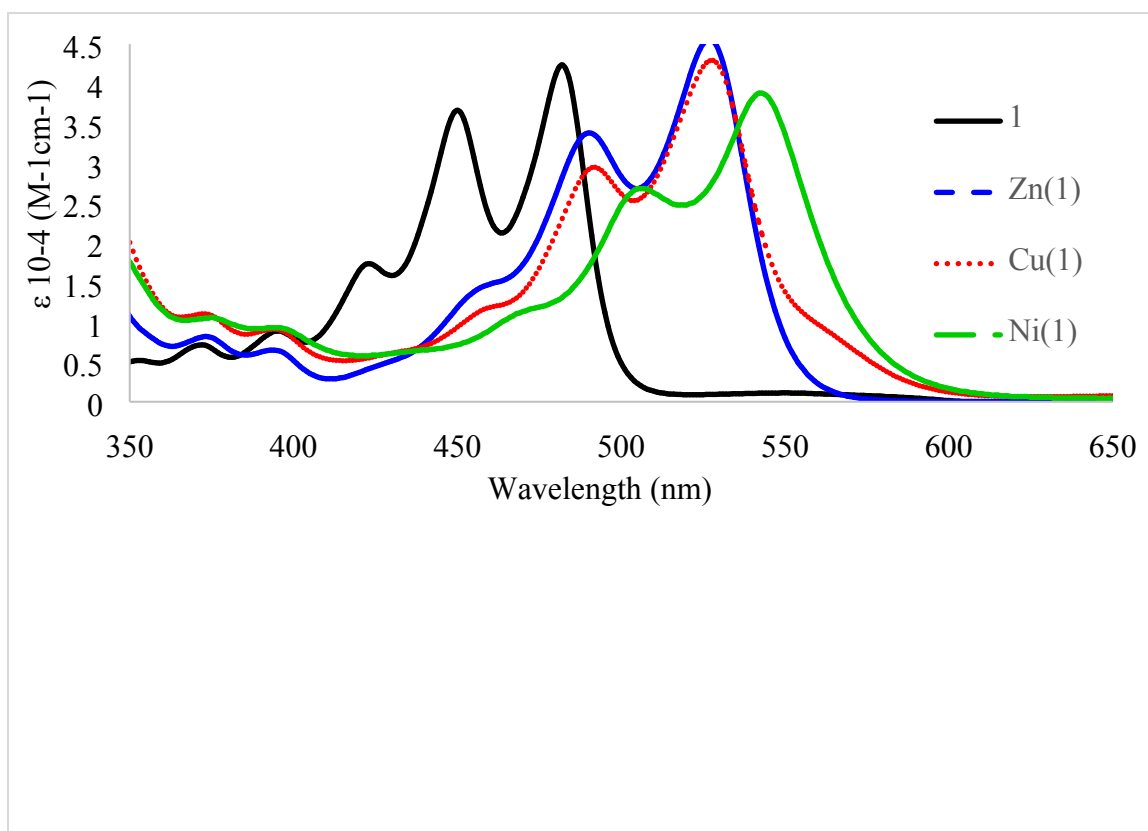

**Figure S11:** The UV-visible spectra of BPYI and its metal complexes in DMF solution.

| Compound |                                                                                   |                                                                                     |
|----------|-----------------------------------------------------------------------------------|-------------------------------------------------------------------------------------|
|          | HOMO                                                                              | LUMO                                                                                |
| BPYI (1) | 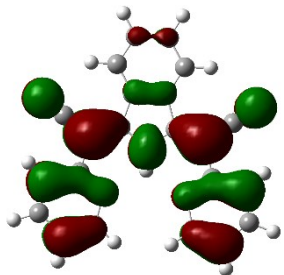 |  |
| BPI      |  |  |

Figure S12. DFT-predicted frontier orbitals for BPYI (1) and BPI.

| Compound |  |
|----------|--|
|          |  |

|       | HOMO                                                                                | LUMO                                                                                 |
|-------|-------------------------------------------------------------------------------------|--------------------------------------------------------------------------------------|
| Zn(1) | 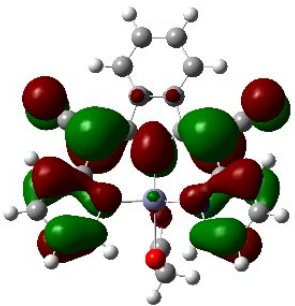   |   |
| Cu(1) |    |   |
| Ni(1) |  |  |

**Figure S13.** DFT-predicted frontier orbitals for the metal complexes of (1).

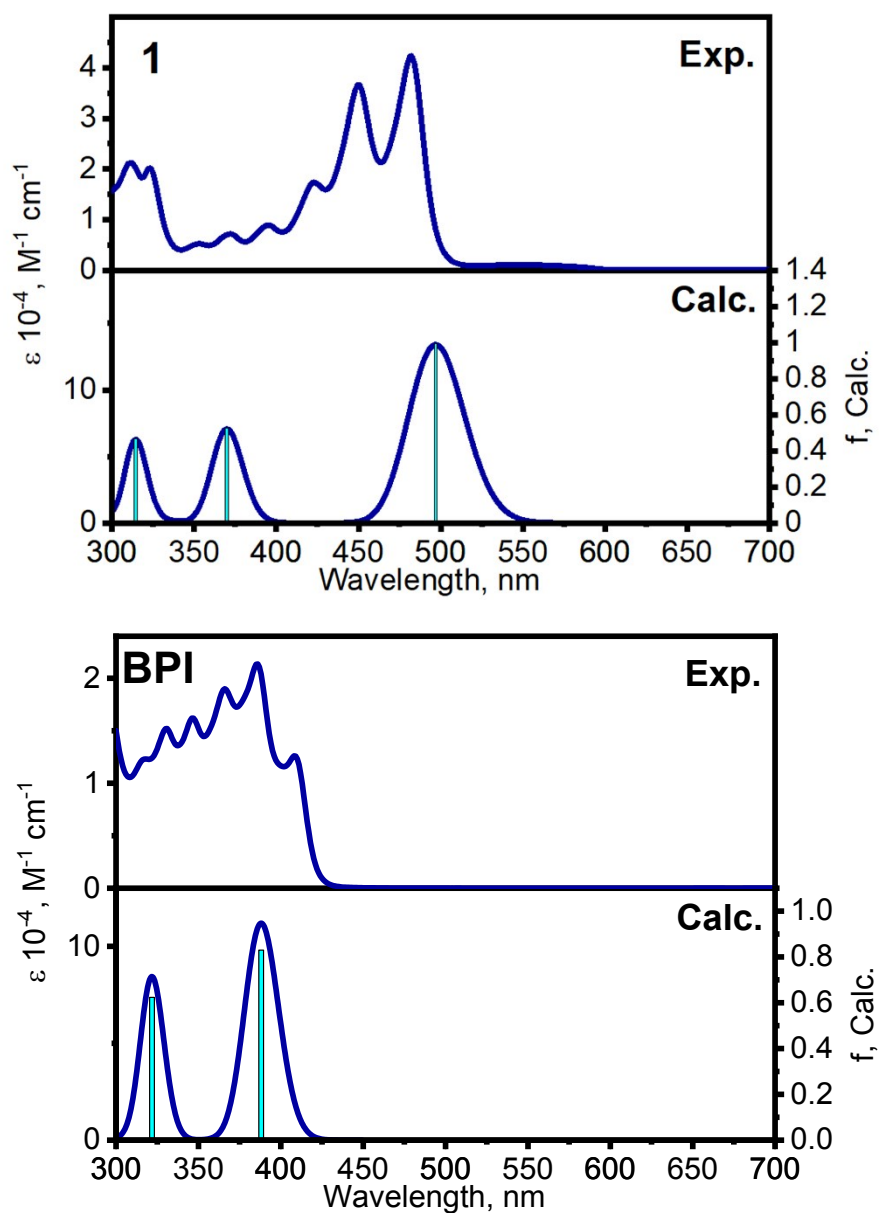

**Figure S14:** Experimental and TDDFT-predicted spectra for compounds BPYI (1) and BPI.

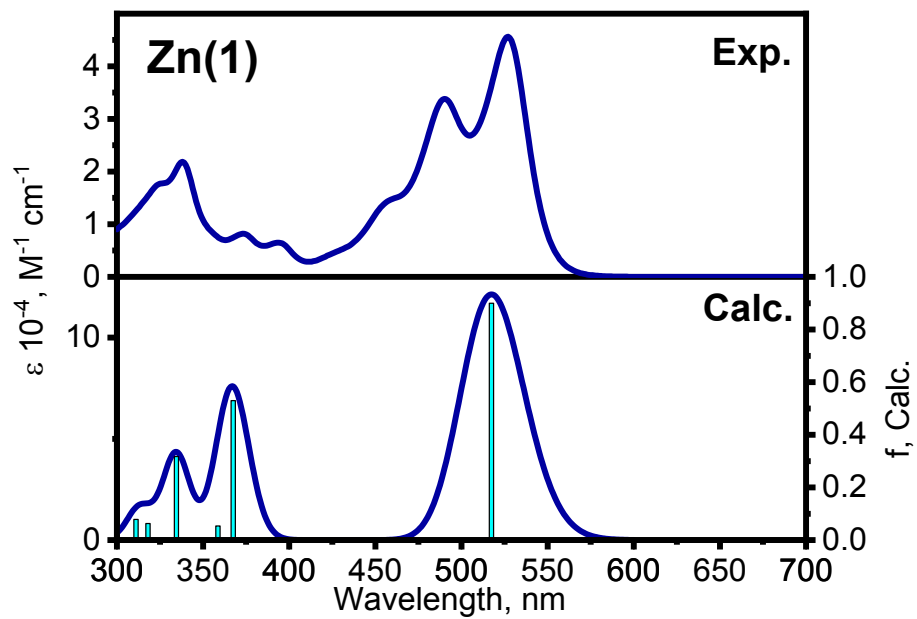

**Figure S15:** Experimental and TDDFT-predicted spectra for **Zn(1)**.

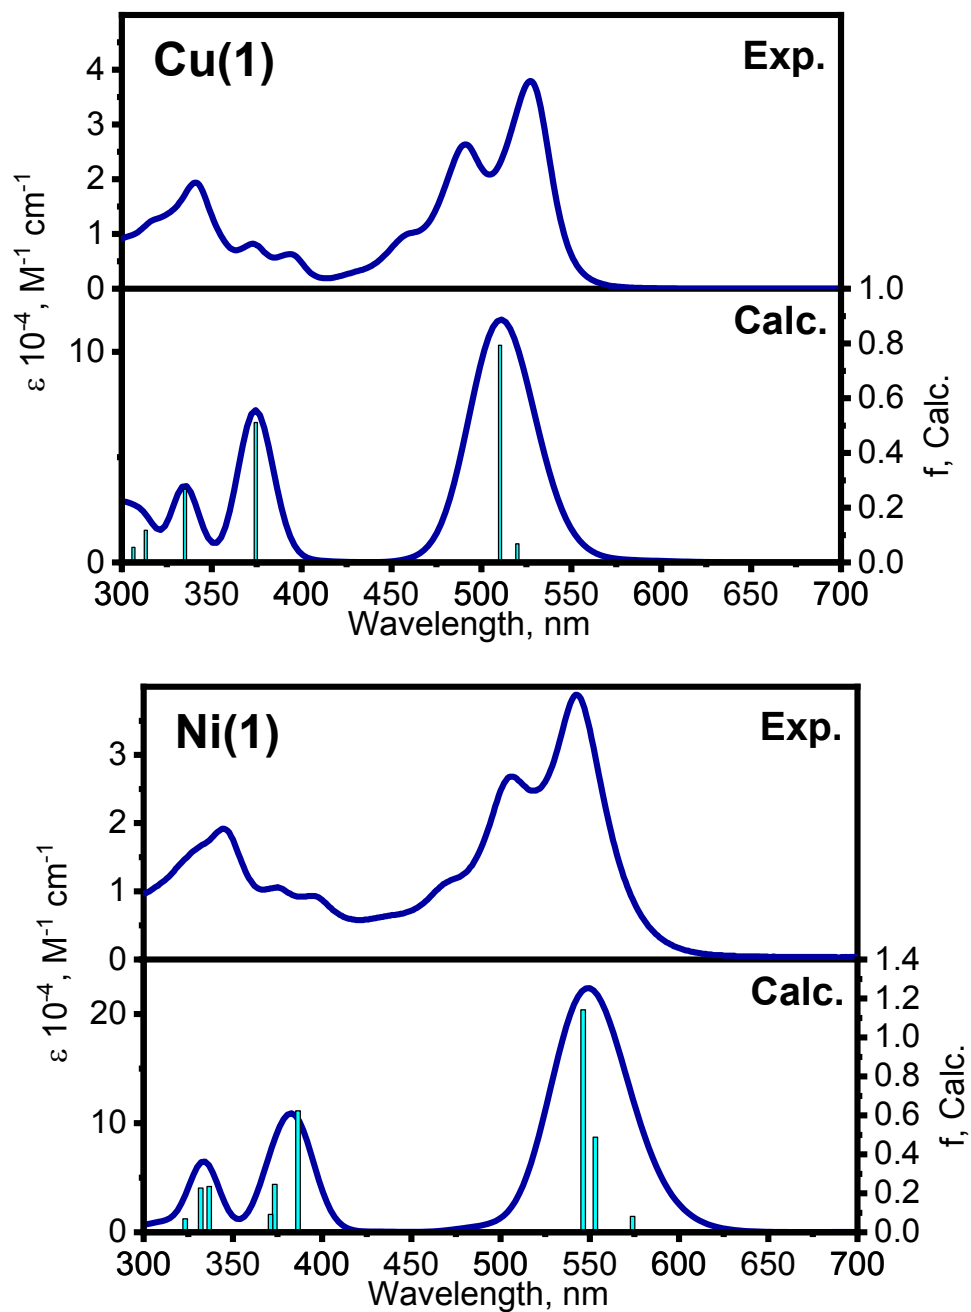

**Figure S15:** Experimental and TDDFT-predicted spectra for compounds **Cu(1)** and **Ni(1)**.



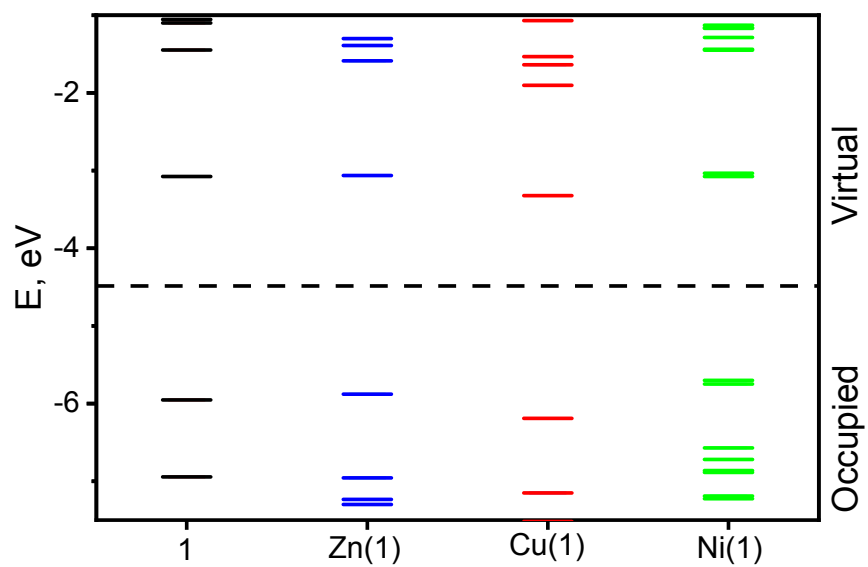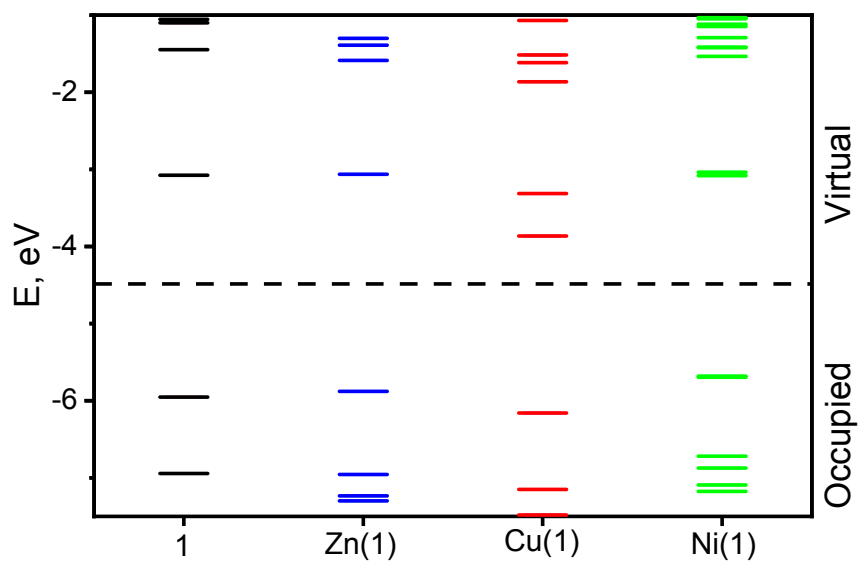

**Figure S16:** B3LYP  $\alpha$ -spin relative energies of the frontier orbitals for compounds.

**Figure S17:** B3LYP  $\beta$ -spin relative energies of the frontier orbitals for compounds.

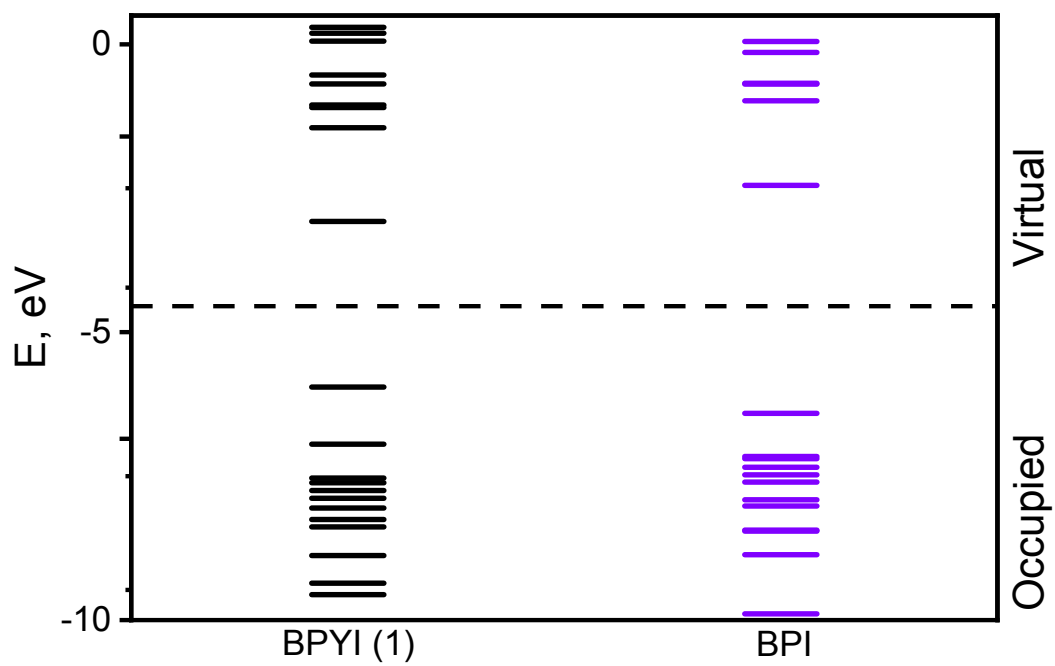

**Figure S17:** B3LYP relative energies of the frontier orbitals for BPYI (1) and BPI.

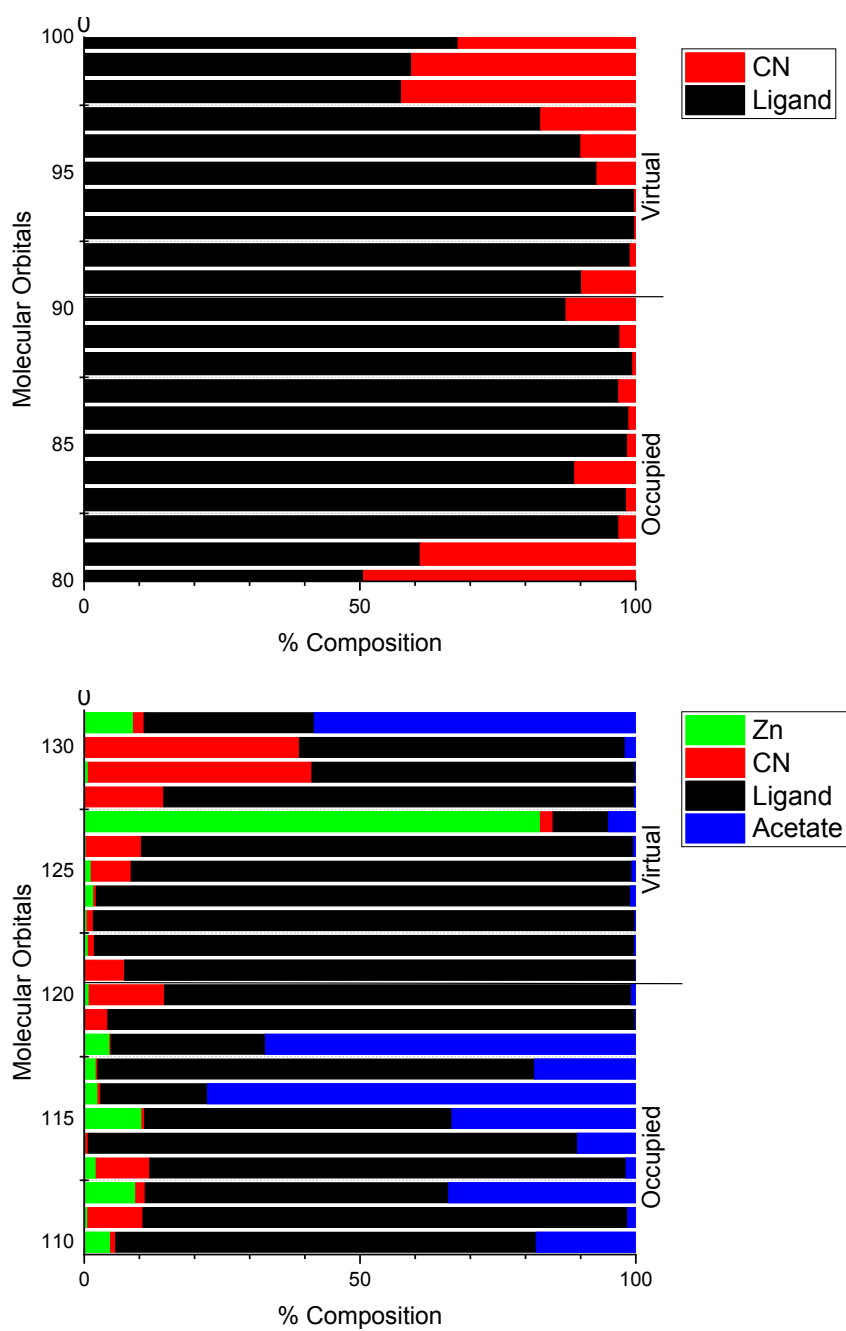

**Figure S18:** Orbital compositions for **1** and **Zn(1)**.

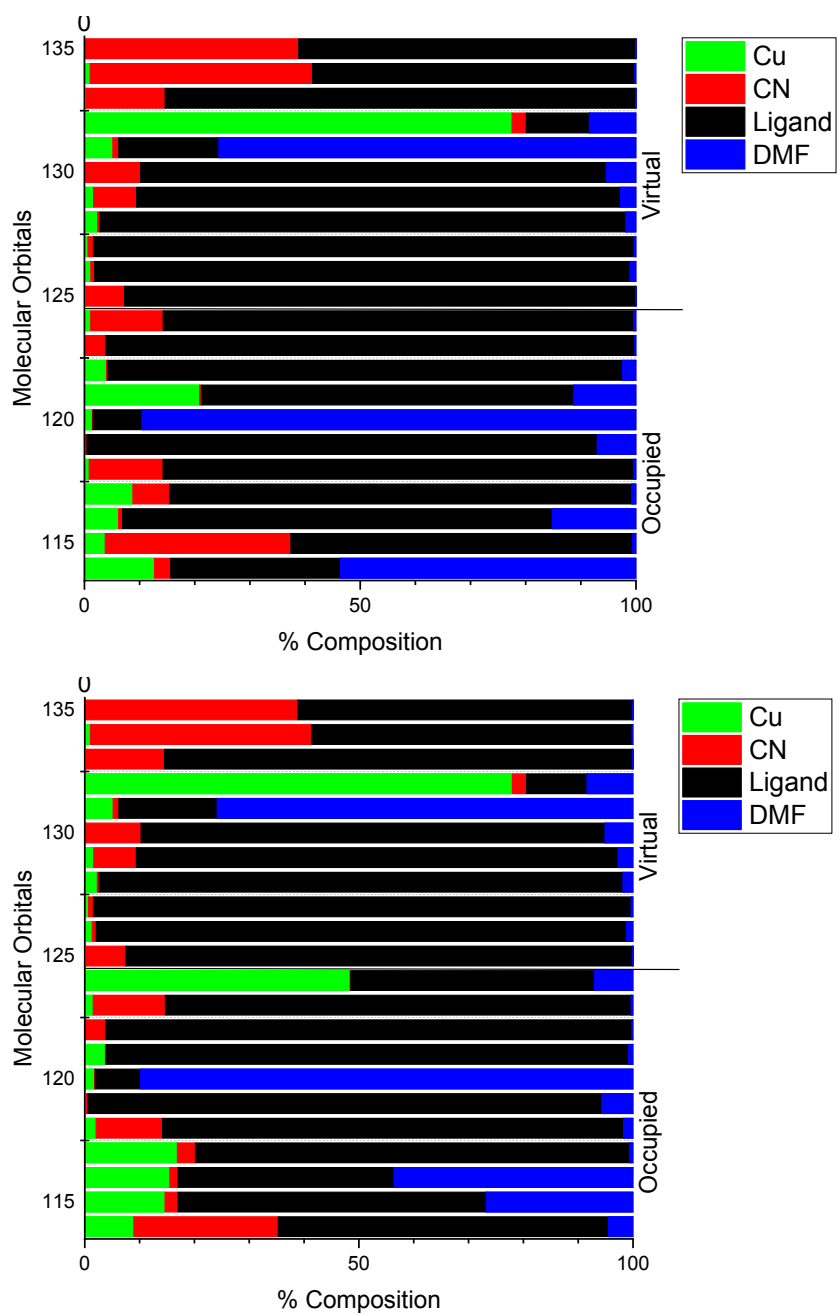

**Figure S19:** Orbital compositions for Cu(1),  $\alpha$ -spin on top and  $\beta$ -spin on bottom.

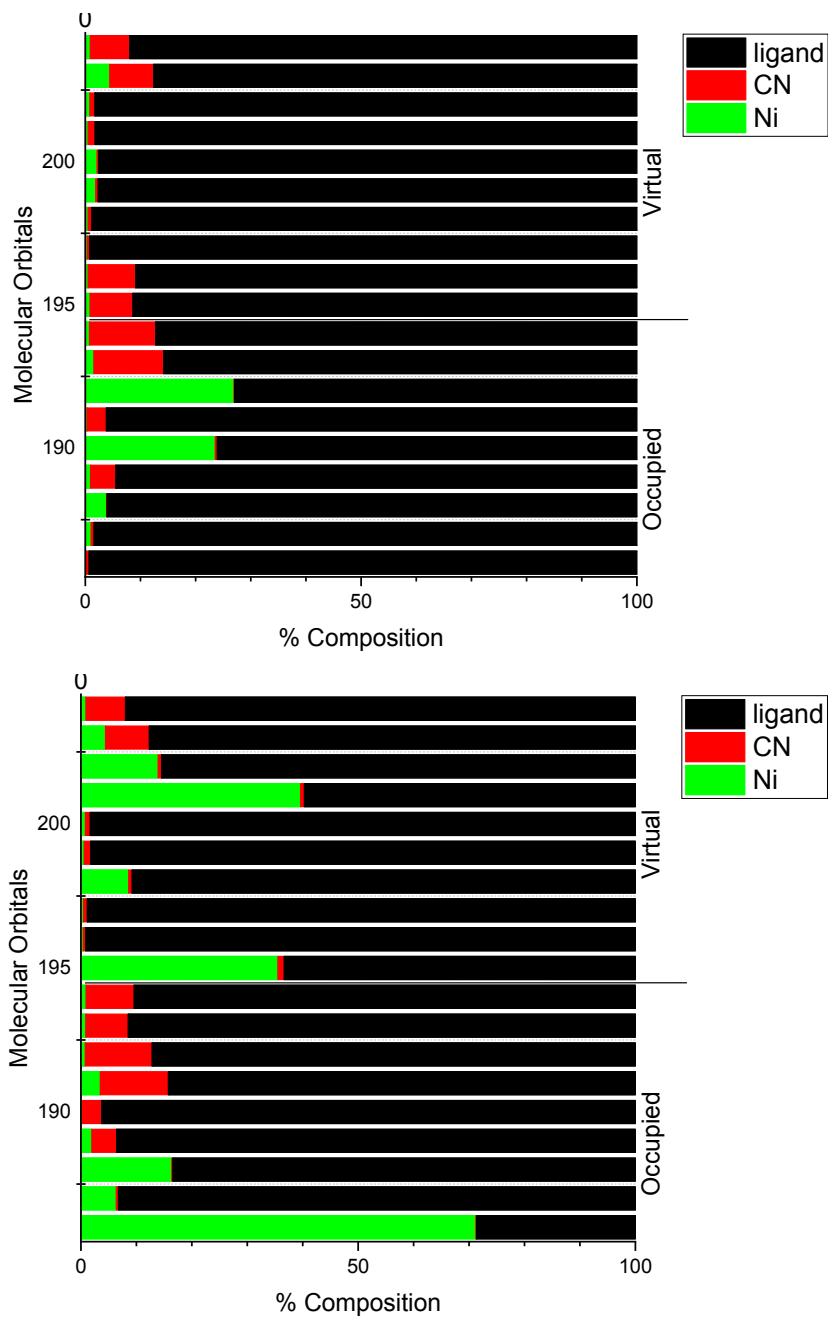

**Figure S20:** Orbital compositions for Ni(1),  $\alpha$ -spin on top and  $\beta$ -spin on bottom.

**Table S1:** X-ray crystal data and structure parameters for compounds **1**, **Zn(1)**, **Cu(1)**, and **Ni(1)**.

| <b>Compound</b>                                  | <b>1 BPYI</b>                                    | <b>Zn(1)</b>                                                     | <b>Cu(1)</b>                                                      | <b>Ni(1)</b>                                       |
|--------------------------------------------------|--------------------------------------------------|------------------------------------------------------------------|-------------------------------------------------------------------|----------------------------------------------------|
| CCDC                                             | 2043926                                          | 2043927                                                          | 2043928                                                           | 2043929                                            |
| Empirical formula                                | C <sub>25</sub> H <sub>20</sub> N <sub>6</sub> O | C <sub>24</sub> H <sub>15</sub> N <sub>5</sub> O <sub>2</sub> Zn | C <sub>25</sub> H <sub>19</sub> ClCuN <sub>6</sub> O <sub>5</sub> | C <sub>44</sub> H <sub>24</sub> N <sub>10</sub> Ni |
| Formula weight                                   | 420.47                                           | 470.78                                                           | 582.45                                                            | 751.44                                             |
| Crystal system                                   | Tetragonal                                       | Triclinic                                                        | Monoclinic                                                        | Tetragonal                                         |
| Space group                                      | P4 <sub>1</sub>                                  | P-1                                                              | P2 <sub>1</sub> /n                                                | I4 <sub>1</sub> /acd                               |
| a/ Å                                             | 12.557(3)                                        | 7.9525(11)                                                       | 8.025                                                             | 17.9413(11)                                        |
| b/ Å                                             | 12.557                                           | 10.8324(15)                                                      | 28.235                                                            | 17.9413(11)                                        |
| c/ Å                                             | 25.933(6)                                        | 12.7721(19)                                                      | 10.565                                                            | 42.212(2)                                          |
| α(°)                                             | 90                                               | 69.282(8)                                                        | 90                                                                | 90                                                 |
| β(°)                                             | 90                                               | 75.267(9)                                                        | 101.66                                                            | 90                                                 |
| γ(°)                                             | 90                                               | 83.931(9)                                                        | 90                                                                | 90                                                 |
| Volume (Å <sup>3</sup> )                         | 4089.2(19)                                       | 995.1(3)                                                         | 2344.4                                                            | 13587.6(18)                                        |
| Z                                                | 8                                                | 2                                                                | 4                                                                 | 16                                                 |
| Dc (Mg/m <sup>3</sup> )                          | 1.366                                            | 1.571                                                            | 1.650                                                             | 1.469                                              |
| μ (mm <sup>-1</sup> )                            | 0.088                                            | 1.268                                                            | 1.098                                                             | 0.623                                              |
| F(000)                                           | 1760                                             | 480                                                              | 1188                                                              | 6176                                               |
| reflns collected                                 | 5255                                             | 15222                                                            | 51946                                                             | 15457                                              |
| indep. reflns                                    | 5255                                             | 3577                                                             | 5789                                                              | 3006                                               |
| GOF on F <sup>2</sup>                            | 1.033                                            | 1.050                                                            | 1.072                                                             | 0.989                                              |
| R1 (on F <sub>o</sub> <sup>2</sup> , I > 2σ(I))  | 0.1284                                           | 0.0922                                                           | 0.0988                                                            | 0.0531                                             |
| wR2 (on F <sub>o</sub> <sup>2</sup> , I > 2σ(I)) | 0.2852                                           | 0.2340                                                           | 0.2303                                                            | 0.1009                                             |
| R1 (all data)                                    | 0.2387                                           | 0.1511                                                           | 0.1248                                                            | 0.1089                                             |
| wR2 (all data)                                   | 0.3539                                           | 0.2727                                                           | 0.2402                                                            | 0.1154                                             |

**Equation 1:** Evans NMR method calculation for effective magnetic moment

$$\mu_{eff} = \sqrt{\frac{3 k_B}{N_A \beta^2} (\chi_M^P T)}$$

$k_B$  = Boltzmann constant

$N_A$  = Avogadro's number

$\beta$  = Bohr magneton

$\chi_p$  = molar susceptibility

T = absolute temperature (K)

**Equation 2:** Evans NMR method calculation for mass susceptibility

$$\chi = \frac{\delta\nu^p}{\nu_o S_f m^p} + \chi_o$$

$\delta\nu^p$  = Shift in frequency for an internal inert reference; regular methanol (Hz)

$\nu_o$  = frequency of the NMR spectrometer (Hz)

$S_f$  = Shape factor of the NMR spectrometer;  $4\pi/3$  sample axis parallel to magnetic field

$m^p$  = concentration of solute (g/mL)

$\chi_o$  = mass susceptibility of the deuterated solvent (mL/g)

**Equation 3:** Evans NMR method calculation for molar susceptibility

$$\chi_M^P = \frac{\delta\nu^p M^p}{\nu_o S_f m^p} - \chi_M^{dia}$$

$\delta\nu^p$  = Shift in frequency for an internal inert reference; regular methanol (Hz)

$M^p$  = Molecular weight of solute (g/mol)

$\nu_o$  = frequency of the NMR spectrometer (Hz)

$S_f$  = Shape factor of the NMR spectrometer;  $4\pi/3$  sample axis parallel to magnetic field

$m^p$  = concentration of solute (g/mL)

$\chi_M^{dia}$  = diamagnetic constant (mL/mol)

**Table S2:** Evans NMR method data and parameters.

| <b>Compound</b>                       | <b>Ni</b>              | <b>Cu</b>              |
|---------------------------------------|------------------------|------------------------|
| Mass (mg)                             | 1.5                    | 1.6                    |
| Volume (mL)                           | 1                      | 1                      |
| Deuterated Solvent                    | Methanol               | Methanol               |
| Mass Susceptibility of solvent (mL/g) | $5.3 \times 10^{-7}$   | $5.3 \times 10^{-7}$   |
| Shift in frequency (Hz)               | 14.02                  | 15.67                  |
| Temperature (K)                       | 303.15                 | 303.15                 |
| Molecular weight of solute (g/mol)    | 751.44                 | 509.36                 |
| Frequency of NMR spectrometer (Hz)    | $4 \times 10^8$        | $4 \times 10^8$        |
| Mass Susceptibility (mL/g)            | $6.1 \times 10^{-6}$   | $6.37 \times 10^{-6}$  |
| Molar Susceptibility (mL/mol)         | $4.59 \times 10^{-3}$  | $3.24 \times 10^{-3}$  |
| Diamagnetic constant (mL/mol)         | $-3.87 \times 10^{-4}$ | $-2.30 \times 10^{-4}$ |
| $\mu_{\text{eff}}$ ( $\mu_{\beta}$ )  | 3.4                    | 2.8                    |



**Table S3:** TDDFT-predicted energies and expansion coefficients for compound **1** (only excited states with  $f > 0.05$  and  $\lambda > 270$  nm are listed).

|               |          |           |           |           |            |                                   |
|---------------|----------|-----------|-----------|-----------|------------|-----------------------------------|
| Excited State | 1:       | Singlet-A | 2.4950 eV | 496.93 nm | $f=0.9941$ | $\langle S^{**2} \rangle = 0.000$ |
|               | 90 -> 91 | 0.70623   |           |           |            |                                   |
| Excited State | 2:       | Singlet-A | 3.3510 eV | 369.99 nm | $f=0.5238$ | $\langle S^{**2} \rangle = 0.000$ |
|               | 89 -> 91 | 0.69523   |           |           |            |                                   |
|               | 90 -> 92 | -0.10532  |           |           |            |                                   |
| Excited State | 6:       | Singlet-A | 3.9424 eV | 314.49 nm | $f=0.4650$ | $\langle S^{**2} \rangle = 0.000$ |
|               | 89 -> 91 | 0.10142   |           |           |            |                                   |
|               | 90 -> 92 | 0.69331   |           |           |            |                                   |

**Table S4:** TDDFT-predicted energies and expansion coefficients for compound **BPI** (only excited states with  $f > 0.05$  and  $\lambda > 270$  nm are listed).

|               |          |            |           |           |            |                                   |
|---------------|----------|------------|-----------|-----------|------------|-----------------------------------|
| Excited State | 1:       | Singlet-B2 | 3.1945 eV | 388.12 nm | $f=0.8299$ | $\langle S^{**2} \rangle = 0.000$ |
|               | 78 -> 79 | 0.70141    |           |           |            |                                   |
| Excited State | 5:       | Singlet-A1 | 3.8525 eV | 321.83 nm | $f=0.6237$ | $\langle S^{**2} \rangle = 0.000$ |
|               | 77 -> 79 | 0.69420    |           |           |            |                                   |
| Excited State | 8:       | Singlet-A1 | 4.5389 eV | 273.16 nm | $f=0.4748$ | $\langle S^{**2} \rangle = 0.000$ |
|               | 69 -> 79 | 0.11265    |           |           |            |                                   |
|               | 71 -> 79 | -0.12727   |           |           |            |                                   |
|               | 78 -> 80 | 0.64409    |           |           |            |                                   |
|               | 78 -> 81 | 0.15667    |           |           |            |                                   |

**Table S5:** TDDFT-predicted energies and expansion coefficients for compound **Zn(1)** (only excited states with  $f > 0.05$  and  $\lambda > 270$  nm are listed).

|               |            |           |           |           |            |                                   |
|---------------|------------|-----------|-----------|-----------|------------|-----------------------------------|
| Excited State | 1:         | Singlet-A | 2.3962 eV | 517.42 nm | $f=0.8999$ | $\langle S^{**2} \rangle = 0.000$ |
|               | 120 -> 121 | 0.70374   |           |           |            |                                   |
| Excited State | 2:         | Singlet-A | 3.3738 eV | 367.49 nm | $f=0.5297$ | $\langle S^{**2} \rangle = 0.000$ |
|               | 119 -> 121 | 0.69910   |           |           |            |                                   |
| Excited State | 3:         | Singlet-A | 3.4570 eV | 358.65 nm | $f=0.0535$ | $\langle S^{**2} \rangle = 0.000$ |
|               | 117 -> 121 | 0.60845   |           |           |            |                                   |
|               | 118 -> 121 | -0.34795  |           |           |            |                                   |
| Excited State | 5:         | Singlet-A | 3.7062 eV | 334.53 nm | $f=0.3172$ | $\langle S^{**2} \rangle = 0.000$ |
|               | 120 -> 122 | 0.69836   |           |           |            |                                   |
| Excited State | 6:         | Singlet-A | 3.8983 eV | 318.05 nm | $f=0.0631$ | $\langle S^{**2} \rangle = 0.000$ |
|               | 120 -> 123 | 0.69942   |           |           |            |                                   |
| Excited State | 7:         | Singlet-A | 3.9854 eV | 311.10 nm | $f=0.0785$ | $\langle S^{**2} \rangle = 0.000$ |
|               | 120 -> 124 | 0.69731   |           |           |            |                                   |
| Excited State | 12:        | Singlet-A | 4.4742 eV | 277.11 nm | $f=0.3183$ | $\langle S^{**2} \rangle = 0.000$ |
|               | 113 -> 121 | 0.12669   |           |           |            |                                   |
|               | 114 -> 121 | 0.29144   |           |           |            |                                   |
|               | 120 -> 125 | 0.60068   |           |           |            |                                   |
|               | 120 -> 126 | -0.12703  |           |           |            |                                   |

**Table S6:** TDDFT-predicted energies and expansion coefficients for compound **Cu(1)** (only excited states with  $f > 0.05$  and  $\lambda > 270$  nm are listed).

|                   |             |           |           |            |                                |
|-------------------|-------------|-----------|-----------|------------|--------------------------------|
| Excited State 6:  | 2.003-A     | 2.3843 eV | 519.99 nm | $f=0.0683$ | $\langle S^{*2} \rangle=0.753$ |
|                   | 124A ->125A | -0.21501  |           |            |                                |
|                   | 97B ->124B  | 0.26046   |           |            |                                |
|                   | 100B ->124B | 0.54514   |           |            |                                |
|                   | 101B ->124B | 0.25681   |           |            |                                |
|                   | 105B ->124B | -0.16894  |           |            |                                |
|                   | 107B ->124B | 0.37628   |           |            |                                |
|                   | 113B ->124B | -0.18799  |           |            |                                |
|                   | 114B ->124B | 0.18689   |           |            |                                |
|                   | 120B ->124B | -0.29054  |           |            |                                |
|                   | 122B ->124B | -0.27741  |           |            |                                |
|                   | 123B ->125B | -0.21708  |           |            |                                |
| Excited State 7:  | 2.004-A     | 2.4294 eV | 510.35 nm | $f=0.7930$ | $\langle S^{*2} \rangle=0.754$ |
|                   | 124A ->125A | 0.66736   |           |            |                                |
|                   | 100B ->124B | 0.19036   |           |            |                                |
|                   | 107B ->124B | 0.19517   |           |            |                                |
|                   | 120B ->124B | -0.10645  |           |            |                                |
|                   | 123B ->125B | 0.65482   |           |            |                                |
| Excited State 14: | 2.010-A     | 3.3106 eV | 374.51 nm | $f=0.5113$ | $\langle S^{*2} \rangle=0.760$ |
|                   | 123A ->125A | 0.69976   |           |            |                                |
|                   | 122B ->125B | 0.69403   |           |            |                                |
| Excited State 20: | 2.006-A     | 3.6993 eV | 335.15 nm | $f=0.2676$ | $\langle S^{*2} \rangle=0.756$ |
|                   | 124A ->126A | 0.69145   |           |            |                                |
|                   | 123B ->126B | 0.69855   |           |            |                                |
| Excited State 25: | 2.037-A     | 3.9574 eV | 313.30 nm | $f=0.1175$ | $\langle S^{*2} \rangle=0.787$ |
|                   | 124A ->127A | 0.68834   |           |            |                                |
|                   | 123B ->127B | 0.68525   |           |            |                                |
| Excited State 27: | 2.005-A     | 4.0462 eV | 306.42 nm | $f=0.0552$ | $\langle S^{*2} \rangle=0.755$ |
|                   | 120A ->125A | -0.12475  |           |            |                                |
|                   | 124A ->128A | 0.66939   |           |            |                                |
|                   | 109B ->124B | -0.12525  |           |            |                                |
|                   | 116B ->124B | 0.15483   |           |            |                                |
|                   | 120B ->125B | -0.13076  |           |            |                                |
|                   | 123B ->128B | 0.66380   |           |            |                                |
| Excited State 30: | 2.019-A     | 4.1321 eV | 300.05 nm | $f=0.0805$ | $\langle S^{*2} \rangle=0.769$ |
|                   | 124A ->128A | 0.10073   |           |            |                                |
|                   | 101B ->124B | 0.14283   |           |            |                                |
|                   | 105B ->124B | -0.13620  |           |            |                                |
|                   | 109B ->124B | 0.18458   |           |            |                                |
|                   | 110B ->124B | 0.11946   |           |            |                                |
|                   | 113B ->124B | 0.34615   |           |            |                                |
|                   | 114B ->124B | -0.50127  |           |            |                                |
|                   | 115B ->124B | -0.16911  |           |            |                                |
|                   | 116B ->124B | -0.18618  |           |            |                                |
|                   | 117B ->124B | 0.61714   |           |            |                                |
|                   | 120B ->124B | 0.10620   |           |            |                                |
| Excited State 31: | 2.061-A     | 4.1742 eV | 297.02 nm | $f=0.0704$ | $\langle S^{*2} \rangle=0.812$ |
|                   | 119A ->125A | 0.17589   |           |            |                                |

|                   |          |           |           |          |              |
|-------------------|----------|-----------|-----------|----------|--------------|
| 124A ->128A       | -0.12568 |           |           |          |              |
| 99B ->124B        | 0.10553  |           |           |          |              |
| 100B ->124B       | 0.13426  |           |           |          |              |
| 101B ->124B       | -0.10506 |           |           |          |              |
| 109B ->124B       | -0.27997 |           |           |          |              |
| 111B ->124B       | 0.24661  |           |           |          |              |
| 113B ->124B       | 0.10912  |           |           |          |              |
| 115B ->124B       | -0.44315 |           |           |          |              |
| 116B ->124B       | 0.65767  |           |           |          |              |
| 117B ->124B       | 0.12566  |           |           |          |              |
| 119B ->125B       | 0.12378  |           |           |          |              |
| 123B ->128B       | -0.11082 |           |           |          |              |
| Excited State 35: | 2.049-A  | 4.3439 eV | 285.42 nm | f=0.1382 | <S**2>=0.800 |
| 119A ->125A       | -0.18548 |           |           |          |              |
| 124A ->129A       | 0.10594  |           |           |          |              |
| 100B ->124B       | 0.21375  |           |           |          |              |
| 101B ->124B       | -0.23817 |           |           |          |              |
| 109B ->124B       | -0.40353 |           |           |          |              |
| 111B ->124B       | -0.18453 |           |           |          |              |
| 114B ->124B       | -0.31031 |           |           |          |              |
| 115B ->124B       | 0.59600  |           |           |          |              |
| 116B ->124B       | 0.15164  |           |           |          |              |
| 119B ->125B       | -0.23175 |           |           |          |              |
| Excited State 36: | 2.165-A  | 4.4056 eV | 281.42 nm | f=0.1936 | <S**2>=0.921 |
| 105B ->124B       | 0.20757  |           |           |          |              |
| 107B ->124B       | 0.31356  |           |           |          |              |
| 113B ->124B       | 0.76446  |           |           |          |              |
| 114B ->124B       | 0.19205  |           |           |          |              |
| 117B ->124B       | -0.25556 |           |           |          |              |
| 118B ->125B       | -0.23091 |           |           |          |              |
| 123B ->130B       | -0.21268 |           |           |          |              |
| Excited State 40: | 2.240-A  | 4.5501 eV | 272.49 nm | f=0.2571 | <S**2>=1.005 |
| 115A ->125A       | -0.12448 |           |           |          |              |
| 119A ->125A       | -0.20544 |           |           |          |              |
| 124A ->129A       | -0.52422 |           |           |          |              |
| 114B ->125B       | 0.19495  |           |           |          |              |
| 119B ->125B       | -0.17010 |           |           |          |              |
| 121B ->128B       | -0.12306 |           |           |          |              |
| 123B ->129B       | 0.70334  |           |           |          |              |
| Excited State 41: | 2.072-A  | 4.5657 eV | 271.56 nm | f=0.1223 | <S**2>=0.823 |
| 118A ->125A       | -0.35625 |           |           |          |              |
| 124A ->130A       | -0.22758 |           |           |          |              |
| 105B ->124B       | -0.28012 |           |           |          |              |
| 107B ->124B       | -0.34218 |           |           |          |              |
| 110B ->124B       | 0.11848  |           |           |          |              |
| 114B ->124B       | 0.46756  |           |           |          |              |
| 115B ->124B       | 0.15618  |           |           |          |              |
| 116B ->125B       | -0.11215 |           |           |          |              |
| 117B ->124B       | 0.26516  |           |           |          |              |
| 118B ->125B       | -0.32042 |           |           |          |              |
| 123B ->130B       | -0.31323 |           |           |          |              |

**Table S7:** TDDFT-predicted energies and expansion coefficients for compound **Ni(1)** (only excited states with  $f > 0.05$  and  $\lambda > 270$  nm are listed).

|                   |              |           |           |            |                                   |
|-------------------|--------------|-----------|-----------|------------|-----------------------------------|
| Excited State 8:  | 3.699-A      | 2.1601 eV | 573.96 nm | $f=0.0814$ | $\langle S^{**2} \rangle = 3.171$ |
|                   | 193A -> 196A | -0.56232  |           |            |                                   |
|                   | 194A -> 195A | 0.78738   |           |            |                                   |
|                   | 191B -> 194B | 0.23828   |           |            |                                   |
| Excited State 10: | 3.019-A      | 2.2415 eV | 553.12 nm | $f=0.4881$ | $\langle S^{**2} \rangle = 2.028$ |
|                   | 193A -> 195A | 0.48975   |           |            |                                   |
|                   | 194A -> 196A | 0.50885   |           |            |                                   |
|                   | 191B -> 193B | 0.37794   |           |            |                                   |
|                   | 192B -> 194B | 0.58831   |           |            |                                   |
| Excited State 11: | 3.031-A      | 2.2695 eV | 546.29 nm | $f=1.1416$ | $\langle S^{**2} \rangle = 2.046$ |
|                   | 193A -> 196A | 0.67808   |           |            |                                   |
|                   | 194A -> 195A | 0.28707   |           |            |                                   |
|                   | 182B -> 195B | 0.10028   |           |            |                                   |
|                   | 191B -> 194B | 0.52656   |           |            |                                   |
|                   | 192B -> 193B | 0.38981   |           |            |                                   |
| Excited State 24: | 3.005-A      | 3.2080 eV | 386.49 nm | $f=0.6230$ | $\langle S^{**2} \rangle = 2.007$ |
|                   | 189A -> 195A | 0.15229   |           |            |                                   |
|                   | 191A -> 196A | 0.68671   |           |            |                                   |
|                   | 189B -> 193B | 0.16214   |           |            |                                   |
|                   | 190B -> 194B | 0.67533   |           |            |                                   |
| Excited State 29: | 3.072-A      | 3.3198 eV | 373.46 nm | $f=0.2461$ | $\langle S^{**2} \rangle = 2.109$ |
|                   | 189A -> 195A | 0.76278   |           |            |                                   |
|                   | 191A -> 196A | -0.24291  |           |            |                                   |
|                   | 189B -> 193B | 0.56773   |           |            |                                   |
| Excited State 32: | 3.151-A      | 3.3410 eV | 371.10 nm | $f=0.0913$ | $\langle S^{**2} \rangle = 2.232$ |
|                   | 187A -> 195A | -0.46255  |           |            |                                   |
|                   | 188A -> 196A | -0.43393  |           |            |                                   |
|                   | 193A -> 199A | -0.12498  |           |            |                                   |
|                   | 194A -> 200A | -0.10206  |           |            |                                   |
|                   | 187B -> 193B | -0.35859  |           |            |                                   |
|                   | 188B -> 194B | -0.42407  |           |            |                                   |
|                   | 192B -> 195B | 0.46508   |           |            |                                   |
| Excited State 43: | 3.094-A      | 3.6822 eV | 336.71 nm | $f=0.2352$ | $\langle S^{**2} \rangle = 2.144$ |
|                   | 194A -> 198A | 0.69486   |           |            |                                   |
|                   | 183B -> 193B | -0.11959  |           |            |                                   |
|                   | 184B -> 194B | -0.12309  |           |            |                                   |
|                   | 186B -> 193B | 0.12277   |           |            |                                   |
|                   | 191B -> 196B | -0.19786  |           |            |                                   |
|                   | 192B -> 197B | 0.62753   |           |            |                                   |
| Excited State 48: | 3.071-A      | 3.7349 eV | 331.96 nm | $f=0.2271$ | $\langle S^{**2} \rangle = 2.108$ |
|                   | 185A -> 195A | -0.10336  |           |            |                                   |
|                   | 186A -> 196A | -0.10447  |           |            |                                   |
|                   | 193A -> 197A | 0.69758   |           |            |                                   |
|                   | 194A -> 201A | -0.17693  |           |            |                                   |

|                    |          |           |           |          |              |
|--------------------|----------|-----------|-----------|----------|--------------|
| 191B -> 196B       | 0.63797  |           |           |          |              |
| 191B -> 200B       | -0.12999 |           |           |          |              |
| 192B -> 197B       | 0.11851  |           |           |          |              |
| Excited State 54:  | 3.119-A  | 3.8356 eV | 323.25 nm | f=0.0690 | <S**2>=2.182 |
| 193A -> 199A       | 0.53547  |           |           |          |              |
| 194A -> 200A       | 0.23341  |           |           |          |              |
| 185B -> 201B       | -0.10268 |           |           |          |              |
| 191B -> 198B       | 0.75996  |           |           |          |              |
| Excited State 99:  | 3.500-A  | 4.4536 eV | 278.39 nm | f=0.1505 | <S**2>=2.813 |
| 181A -> 196A       | 0.10872  |           |           |          |              |
| 182A -> 195A       | -0.17776 |           |           |          |              |
| 185A -> 195A       | -0.11147 |           |           |          |              |
| 187A -> 201A       | 0.16936  |           |           |          |              |
| 188A -> 197A       | -0.16198 |           |           |          |              |
| 188A -> 202A       | -0.10812 |           |           |          |              |
| 190A -> 199A       | 0.20182  |           |           |          |              |
| 192A -> 200A       | -0.21922 |           |           |          |              |
| 193A -> 203A       | 0.18160  |           |           |          |              |
| 194A -> 204A       | 0.17369  |           |           |          |              |
| 172B -> 193B       | 0.10928  |           |           |          |              |
| 175B -> 194B       | 0.16361  |           |           |          |              |
| 179B -> 194B       | -0.34614 |           |           |          |              |
| 184B -> 194B       | 0.12231  |           |           |          |              |
| 187B -> 199B       | -0.11060 |           |           |          |              |
| 188B -> 196B       | 0.14438  |           |           |          |              |
| 191B -> 203B       | 0.64180  |           |           |          |              |
| 192B -> 199B       | 0.10345  |           |           |          |              |
| 192B -> 204B       | 0.16474  |           |           |          |              |
| Excited State 104: | 3.114-A  | 4.4757 eV | 277.02 nm | f=0.5376 | <S**2>=2.175 |
| 185A -> 195A       | 0.19268  |           |           |          |              |
| 186A -> 196A       | 0.10475  |           |           |          |              |
| 193A -> 203A       | -0.25341 |           |           |          |              |
| 194A -> 204A       | -0.48353 |           |           |          |              |
| 183B -> 193B       | -0.17939 |           |           |          |              |
| 192B -> 204B       | 0.74358  |           |           |          |              |

**Table S8:** DFT optimized geometry of compound **1**.

| Center<br>Number | Atomic<br>Number | Atomic<br>Type | Coordinates (Angstroms) |           |           |
|------------------|------------------|----------------|-------------------------|-----------|-----------|
|                  |                  |                | X                       | Y         | Z         |
| 1                | 6                | 0              | -2.038857               | -3.258985 | -0.057884 |
| 2                | 1                | 0              | -1.187090               | -3.931563 | -0.089187 |
| 3                | 6                | 0              | -3.334263               | -3.765451 | -0.041210 |
| 4                | 1                | 0              | -3.507123               | -4.834732 | -0.057735 |
| 5                | 6                | 0              | -4.387492               | -2.855015 | -0.002507 |
| 6                | 1                | 0              | -5.416348               | -3.197406 | 0.012907  |
| 7                | 6                | 0              | -4.107627               | -1.496342 | 0.015558  |
| 8                | 1                | 0              | -4.915437               | -0.776281 | 0.044625  |
| 9                | 6                | 0              | -2.766961               | -1.070382 | -0.004386 |
| 10               | 6                | 0              | -2.426885               | 0.368090  | 0.008097  |
| 11               | 6                | 0              | -3.528374               | 1.264493  | 0.021816  |
| 12               | 6                | 0              | -1.148478               | 0.895988  | 0.004641  |
| 13               | 6                | 0              | -0.707241               | 2.299105  | 0.004012  |
| 14               | 6                | 0              | -1.413382               | 3.502378  | 0.007831  |
| 15               | 1                | 0              | -2.493203               | 3.526537  | 0.014070  |
| 16               | 6                | 0              | -0.698407               | 4.698157  | 0.003754  |
| 17               | 1                | 0              | -1.236949               | 5.639202  | 0.006774  |
| 18               | 6                | 0              | 0.697746                | 4.698244  | -0.004113 |
| 19               | 1                | 0              | 1.236168                | 5.639355  | -0.007281 |
| 20               | 6                | 0              | 1.412865                | 3.502533  | -0.008025 |
| 21               | 1                | 0              | 2.492683                | 3.526818  | -0.014247 |
| 22               | 6                | 0              | 0.706863                | 2.299207  | -0.004037 |
| 23               | 6                | 0              | 1.148302                | 0.896092  | -0.004609 |
| 24               | 6                | 0              | 2.426790                | 0.368404  | -0.007963 |
| 25               | 6                | 0              | 3.528161                | 1.264944  | -0.021591 |
| 26               | 6                | 0              | 2.767112                | -1.070041 | 0.004505  |
| 27               | 6                | 0              | 4.107835                | -1.495743 | -0.015095 |
| 28               | 1                | 0              | 4.915534                | -0.775537 | -0.043682 |
| 29               | 6                | 0              | 4.387935                | -2.854378 | 0.002760  |
| 30               | 1                | 0              | 5.416849                | -3.196579 | -0.012417 |
| 31               | 6                | 0              | 3.334874                | -3.765011 | 0.040984  |
| 32               | 1                | 0              | 3.507925                | -4.834268 | 0.057327  |
| 33               | 6                | 0              | 2.039371                | -3.258781 | 0.057441  |
| 34               | 1                | 0              | 1.187728                | -3.931525 | 0.088423  |
| 35               | 7                | 0              | -0.000043               | 0.141702  | 0.000041  |
| 36               | 1                | 0              | -0.000044               | -0.880124 | -0.000003 |
| 37               | 7                | 0              | -1.752593               | -1.955606 | -0.039136 |
| 38               | 7                | 0              | -4.456768               | 1.957363  | 0.033506  |
| 39               | 7                | 0              | 1.752880                | -1.955447 | 0.038838  |
| 40               | 7                | 0              | 4.456524                | 1.957852  | -0.033172 |

$E_h = -1120.173695$  Hartree

**Table S9:** DFT optimized geometry of compound **BPI**.

| Center<br>Number | Atomic<br>Number | Atomic<br>Type | Coordinates (Angstroms) |           |           |
|------------------|------------------|----------------|-------------------------|-----------|-----------|
|                  |                  |                | X                       | Y         | Z         |
| 1                | 7                | 0              | 0.000000                | 1.946679  | -1.751293 |
| 2                | 7                | 0              | 0.000000                | 0.000000  | 0.210966  |
| 3                | 7                | 0              | 0.000000                | 2.409879  | 0.618461  |
| 4                | 6                | 0              | 0.000000                | 0.704739  | 4.789695  |
| 5                | 1                | 0              | 0.000000                | 1.236565  | 5.734627  |
| 6                | 6                | 0              | 0.000000                | 4.231754  | -0.943798 |
| 7                | 1                | 0              | 0.000000                | 4.898771  | -0.092163 |
| 8                | 6                | 0              | 0.000000                | 1.161289  | 0.987110  |
| 9                | 6                | 0              | 0.000000                | 2.423456  | -3.014758 |
| 10               | 1                | 0              | 0.000000                | 1.680330  | -3.805118 |
| 11               | 6                | 0              | 0.000000                | 1.427955  | 3.583609  |
| 12               | 1                | 0              | 0.000000                | 2.511231  | 3.573232  |
| 13               | 6                | 0              | 0.000000                | 0.703512  | 2.391736  |
| 14               | 6                | 0              | 0.000000                | 2.837363  | -0.717412 |
| 15               | 6                | 0              | 0.000000                | 3.791188  | -3.321390 |
| 16               | 1                | 0              | 0.000000                | 4.120774  | -4.352744 |
| 17               | 6                | 0              | 0.000000                | 4.709200  | -2.256902 |
| 18               | 1                | 0              | 0.000000                | 5.775656  | -2.449945 |
| 19               | 7                | 0              | 0.000000                | -1.946679 | -1.751293 |
| 20               | 7                | 0              | 0.000000                | -2.409879 | 0.618461  |
| 21               | 6                | 0              | 0.000000                | -0.704739 | 4.789695  |
| 22               | 1                | 0              | 0.000000                | -1.236565 | 5.734627  |
| 23               | 6                | 0              | 0.000000                | -4.231754 | -0.943798 |
| 24               | 1                | 0              | 0.000000                | -4.898771 | -0.092163 |
| 25               | 6                | 0              | 0.000000                | -1.161289 | 0.987110  |
| 26               | 6                | 0              | 0.000000                | -2.423456 | -3.014758 |
| 27               | 1                | 0              | 0.000000                | -1.680330 | -3.805118 |
| 28               | 6                | 0              | 0.000000                | -1.427955 | 3.583609  |
| 29               | 1                | 0              | 0.000000                | -2.511231 | 3.573232  |
| 30               | 6                | 0              | 0.000000                | -0.703512 | 2.391736  |
| 31               | 6                | 0              | 0.000000                | -2.837363 | -0.717412 |
| 32               | 6                | 0              | 0.000000                | -3.791188 | -3.321390 |
| 33               | 1                | 0              | 0.000000                | -4.120774 | -4.352744 |
| 34               | 6                | 0              | 0.000000                | -4.709200 | -2.256902 |
| 35               | 1                | 0              | 0.000000                | -5.775656 | -2.449945 |
| 36               | 1                | 0              | 0.000000                | 0.000000  | -0.807567 |

 $E_h = -966.678725$  Hartree

**Table S10:** DFT optimized geometry of compound **Zn(1)**.

| Center Number | Atomic Number | Atomic Type | Coordinates (Angstroms) |           |           |
|---------------|---------------|-------------|-------------------------|-----------|-----------|
|               |               |             | X                       | Y         | Z         |
| 1             | 6             | 0           | 2.683375                | -2.232021 | -0.894964 |
| 2             | 1             | 0           | 3.446142                | -1.485468 | -0.717084 |
| 3             | 6             | 0           | 2.992427                | -3.460970 | -1.449828 |
| 4             | 1             | 0           | 4.010392                | -3.686023 | -1.741546 |
| 5             | 6             | 0           | 1.959169                | -4.381614 | -1.608665 |
| 6             | 1             | 0           | 2.146102                | -5.357817 | -2.041646 |
| 7             | 6             | 0           | 0.680060                | -4.037749 | -1.207449 |
| 8             | 1             | 0           | -0.128346               | -4.745233 | -1.332260 |
| 9             | 6             | 0           | 0.419957                | -2.769152 | -0.653189 |
| 10            | 6             | 0           | -0.960981               | -2.434195 | -0.244807 |
| 11            | 6             | 0           | -1.819947               | -3.556546 | -0.103803 |
| 12            | 6             | 0           | -1.504519               | -1.166324 | -0.058718 |
| 13            | 6             | 0           | -2.917508               | -0.793959 | 0.173222  |
| 14            | 6             | 0           | -4.084546               | -1.536904 | 0.346096  |
| 15            | 1             | 0           | -4.077763               | -2.616838 | 0.338850  |
| 16            | 6             | 0           | -5.288528               | -0.859007 | 0.539468  |
| 17            | 1             | 0           | -6.201097               | -1.427008 | 0.682807  |
| 18            | 6             | 0           | -5.330357               | 0.534982  | 0.550321  |
| 19            | 1             | 0           | -6.275278               | 1.044853  | 0.702370  |
| 20            | 6             | 0           | -4.169305               | 1.286688  | 0.367484  |
| 21            | 1             | 0           | -4.227196               | 2.365074  | 0.377029  |
| 22            | 6             | 0           | -2.959976               | 0.617765  | 0.183468  |
| 23            | 6             | 0           | -1.572504               | 1.077502  | -0.045872 |
| 24            | 6             | 0           | -1.107613               | 2.378077  | -0.221848 |
| 25            | 6             | 0           | -2.029831               | 3.445317  | -0.055259 |
| 26            | 6             | 0           | 0.244476                | 2.797804  | -0.646985 |
| 27            | 6             | 0           | 0.424672                | 4.088691  | -1.181217 |
| 28            | 1             | 0           | -0.422219               | 4.754986  | -1.272941 |
| 29            | 6             | 0           | 1.674306                | 4.506827  | -1.604019 |
| 30            | 1             | 0           | 1.799911                | 5.500255  | -2.019562 |
| 31            | 6             | 0           | 2.757668                | 3.638338  | -1.489942 |
| 32            | 1             | 0           | 3.754778                | 3.922011  | -1.801826 |
| 33            | 6             | 0           | 2.527254                | 2.385719  | -0.950327 |
| 34            | 1             | 0           | 3.332129                | 1.677628  | -0.804148 |
| 35            | 6             | 0           | 2.952418                | 0.083983  | 2.133468  |
| 36            | 6             | 0           | 3.812425                | 0.048525  | 3.375950  |
| 37            | 1             | 0           | 3.311797                | 0.537189  | 4.211915  |
| 38            | 1             | 0           | 4.780061                | 0.514242  | 3.191908  |
| 39            | 1             | 0           | 3.985750                | -0.995290 | 3.655213  |
| 40            | 7             | 0           | -0.767486               | -0.020511 | -0.132105 |
| 41            | 7             | 0           | 1.440648                | -1.884622 | -0.509218 |



|    |    |   |           |           |           |
|----|----|---|-----------|-----------|-----------|
| 42 | 7  | 0 | 1.314357  | 1.967686  | -0.540818 |
| 43 | 7  | 0 | -2.489478 | -4.495390 | 0.013701  |
| 44 | 7  | 0 | -2.752413 | 4.340787  | 0.084504  |
| 45 | 8  | 0 | 1.680309  | 0.038052  | 2.276589  |
| 46 | 8  | 0 | 3.474187  | 0.127764  | 0.992968  |
| 47 | 30 | 0 | 1.200464  | 0.044820  | 0.282884  |

---

**$E_h = -3127.570282$  Hartree**

**Table S11:** DFT optimized geometry of compound **Cu(1)**.

| Center Number | Atomic Number | Atomic Type | Coordinates (Angstroms) |           |           |
|---------------|---------------|-------------|-------------------------|-----------|-----------|
|               |               |             | X                       | Y         | Z         |
| 1             | 6             | 0           | -1.995164               | 2.589000  | -1.127781 |
| 2             | 1             | 0           | -2.830687               | 1.903864  | -1.140055 |
| 3             | 6             | 0           | -2.144840               | 3.901833  | -1.529140 |
| 4             | 1             | 0           | -3.106268               | 4.253779  | -1.879965 |
| 5             | 6             | 0           | -1.031330               | 4.737346  | -1.461548 |
| 6             | 1             | 0           | -1.096791               | 5.775793  | -1.764866 |
| 7             | 6             | 0           | 0.168185                | 4.226156  | -1.002952 |
| 8             | 1             | 0           | 1.039049                | 4.864457  | -0.950897 |
| 9             | 6             | 0           | 0.270118                | 2.875747  | -0.614492 |
| 10            | 6             | 0           | 1.555581                | 2.348781  | -0.138837 |
| 11            | 6             | 0           | 2.530720                | 3.345659  | 0.137200  |
| 12            | 6             | 0           | 1.906443                | 1.016381  | 0.029025  |
| 13            | 6             | 0           | 3.218680                | 0.474043  | 0.431838  |
| 14            | 6             | 0           | 4.427149                | 1.075394  | 0.784473  |
| 15            | 1             | 0           | 4.547087                | 2.147537  | 0.806508  |
| 16            | 6             | 0           | 5.507605                | 0.261342  | 1.121243  |
| 17            | 1             | 0           | 6.449812                | 0.719068  | 1.401024  |
| 18            | 6             | 0           | 5.389154                | -1.127963 | 1.101994  |
| 19            | 1             | 0           | 6.239614                | -1.746037 | 1.367009  |
| 20            | 6             | 0           | 4.187262                | -1.737577 | 0.745195  |
| 21            | 1             | 0           | 4.123501                | -2.814775 | 0.737555  |
| 22            | 6             | 0           | 3.099086                | -0.930541 | 0.412132  |
| 23            | 6             | 0           | 1.717109                | -1.231758 | -0.008758 |
| 24            | 6             | 0           | 1.151998                | -2.480747 | -0.229030 |
| 25            | 6             | 0           | 1.934741                | -3.636745 | 0.037959  |
| 26            | 6             | 0           | -0.184919               | -2.764902 | -0.764853 |
| 27            | 6             | 0           | -0.496205               | -4.060651 | -1.222278 |
| 28            | 1             | 0           | 0.249915                | -4.840938 | -1.166132 |
| 29            | 6             | 0           | -1.740464               | -4.337327 | -1.756391 |
| 30            | 1             | 0           | -1.966961               | -5.335686 | -2.112351 |
| 31            | 6             | 0           | -2.689231               | -3.318854 | -1.834882 |
| 32            | 1             | 0           | -3.675735               | -3.483679 | -2.248182 |
| 33            | 6             | 0           | -2.340114               | -2.070678 | -1.359066 |
| 34            | 1             | 0           | -3.045411               | -1.251306 | -1.377777 |
| 35            | 6             | 0           | -3.048591               | -0.072296 | 1.631785  |
| 36            | 1             | 0           | -2.300623               | -0.453029 | 2.331269  |
| 37            | 6             | 0           | -4.572331               | -0.359081 | 3.496880  |
| 38            | 1             | 0           | -3.668194               | -0.706769 | 3.992745  |
| 39            | 1             | 0           | -5.314915               | -1.158788 | 3.506872  |
| 40            | 1             | 0           | -4.968888               | 0.501222  | 4.038810  |
| 41            | 6             | 0           | -5.389846               | 0.513535  | 1.310455  |

|    |    |   |           |           |           |
|----|----|---|-----------|-----------|-----------|
| 42 | 1  | 0 | -5.795902 | 1.419900  | 1.763741  |
| 43 | 1  | 0 | -6.173605 | -0.245079 | 1.272447  |
| 44 | 1  | 0 | -5.044283 | 0.731713  | 0.304931  |
| 45 | 29 | 0 | -0.860584 | 0.116339  | -0.302090 |
| 46 | 7  | 0 | 1.059779  | -0.040989 | -0.191993 |
| 47 | 7  | 0 | -0.825852 | 2.080863  | -0.684205 |
| 48 | 7  | 0 | -1.126987 | -1.792882 | -0.835182 |
| 49 | 7  | 0 | 3.288920  | 4.193253  | 0.355913  |
| 50 | 7  | 0 | 2.529136  | -4.607579 | 0.251073  |
| 51 | 7  | 0 | -4.273293 | 0.020684  | 2.116395  |
| 52 | 8  | 0 | -2.731309 | 0.244365  | 0.456613  |

-----  
 **$E_h = -3008.566038$  Hartree**

**Table S12:** DFT optimized geometry of compound Ni(1).

| Center<br>Number | Atomic<br>Number | Atomic<br>Type | Coordinates (Angstroms) |           |           |
|------------------|------------------|----------------|-------------------------|-----------|-----------|
|                  |                  |                | X                       | Y         | Z         |
| 1                | 6                | 0              | -0.970011               | -1.676388 | 2.316321  |
| 2                | 1                | 0              | -1.696273               | -0.878138 | 2.256601  |
| 3                | 6                | 0              | -1.186933               | -2.762418 | 3.147393  |
| 4                | 1                | 0              | -2.082649               | -2.813960 | 3.753560  |
| 5                | 6                | 0              | -0.231151               | -3.775430 | 3.152928  |
| 6                | 1                | 0              | -0.361367               | -4.662731 | 3.762434  |
| 7                | 6                | 0              | 0.907909                | -3.624896 | 2.383029  |
| 8                | 1                | 0              | 1.675356                | -4.386229 | 2.408649  |
| 9                | 6                | 0              | 1.089064                | -2.468060 | 1.595557  |
| 10               | 6                | 0              | 2.387023                | -2.240008 | 0.940737  |
| 11               | 6                | 0              | 3.287957                | -3.335260 | 1.016880  |
| 12               | 6                | 0              | 2.857819                | -1.049858 | 0.383700  |
| 13               | 6                | 0              | 4.277383                | -0.674115 | 0.203923  |
| 14               | 6                | 0              | 5.481587                | -1.349019 | 0.409764  |
| 15               | 1                | 0              | 5.510138                | -2.383180 | 0.718028  |
| 16               | 6                | 0              | 6.679373                | -0.666789 | 0.200888  |
| 17               | 1                | 0              | 7.619800                | -1.184318 | 0.355634  |
| 18               | 6                | 0              | 6.679159                | 0.667881  | -0.203995 |
| 19               | 1                | 0              | 7.619422                | 1.185467  | -0.359527 |
| 20               | 6                | 0              | 5.481119                | 1.349983  | -0.411886 |
| 21               | 1                | 0              | 5.509254                | 2.384137  | -0.720239 |
| 22               | 6                | 0              | 4.277177                | 0.674937  | -0.205016 |
| 23               | 6                | 0              | 2.857507                | 1.050589  | -0.383877 |
| 24               | 6                | 0              | 2.386305                | 2.240849  | -0.940338 |
| 25               | 6                | 0              | 3.286922                | 3.336358  | -1.016221 |
| 26               | 6                | 0              | 1.088117                | 2.468725  | -1.594780 |
| 27               | 6                | 0              | 0.906213                | 3.625985  | -2.381445 |
| 28               | 1                | 0              | 1.673036                | 4.387978  | -2.406309 |
| 29               | 6                | 0              | -0.232803               | 3.776121  | -3.151498 |
| 30               | 1                | 0              | -0.363602               | 4.663723  | -3.760440 |
| 31               | 6                | 0              | -1.187780               | 2.762346  | -3.146854 |
| 32               | 1                | 0              | -2.083322               | 2.813510  | -3.753314 |
| 33               | 6                | 0              | -0.970301               | 1.676051  | -2.316273 |
| 34               | 1                | 0              | -1.696083               | 0.877331  | -2.257029 |
| 35               | 7                | 0              | 2.069928                | 0.000309  | 0.000066  |
| 36               | 7                | 0              | 0.111824                | -1.532620 | 1.532868  |
| 37               | 7                | 0              | 0.111474                | 1.532621  | -1.532689 |
| 38               | 7                | 0              | 3.978618                | -4.265278 | 1.065667  |
| 39               | 7                | 0              | 3.977328                | 4.266582  | -1.064800 |
| 40               | 28               | 0              | 0.000004                | 0.000006  | 0.000247  |

|    |   |   |           |           |           |
|----|---|---|-----------|-----------|-----------|
| 41 | 6 | 0 | 0.969975  | 1.676428  | 2.316317  |
| 42 | 1 | 0 | 1.696245  | 0.878184  | 2.256608  |
| 43 | 6 | 0 | 1.186884  | 2.762470  | 3.147376  |
| 44 | 1 | 0 | 2.082598  | 2.814028  | 3.753545  |
| 45 | 6 | 0 | 0.231091  | 3.775472  | 3.152896  |
| 46 | 1 | 0 | 0.361298  | 4.662783  | 3.762389  |
| 47 | 6 | 0 | -0.907965 | 3.624917  | 2.382997  |
| 48 | 1 | 0 | -1.675417 | 4.386245  | 2.408605  |
| 49 | 6 | 0 | -1.089108 | 2.468068  | 1.595539  |
| 50 | 6 | 0 | -2.387061 | 2.239989  | 0.940715  |
| 51 | 6 | 0 | -3.288043 | 3.335203  | 1.016870  |
| 52 | 6 | 0 | -2.857825 | 1.049836  | 0.383667  |
| 53 | 6 | 0 | -4.277380 | 0.674080  | 0.203878  |
| 54 | 6 | 0 | -5.481588 | 1.348978  | 0.409709  |
| 55 | 1 | 0 | -5.510145 | 2.383140  | 0.717974  |
| 56 | 6 | 0 | -6.679367 | 0.666741  | 0.200821  |
| 57 | 1 | 0 | -7.619799 | 1.184264  | 0.355559  |
| 58 | 6 | 0 | -6.679139 | -0.667928 | -0.204064 |
| 59 | 1 | 0 | -7.619398 | -1.185521 | -0.359604 |
| 60 | 6 | 0 | -5.481093 | -1.350021 | -0.411950 |
| 61 | 1 | 0 | -5.509219 | -2.384174 | -0.720308 |
| 62 | 6 | 0 | -4.277155 | -0.674969 | -0.205069 |
| 63 | 6 | 0 | -2.857478 | -1.050604 | -0.383927 |
| 64 | 6 | 0 | -2.386255 | -2.240853 | -0.940399 |
| 65 | 6 | 0 | -3.286843 | -3.336386 | -1.016283 |
| 66 | 6 | 0 | -1.088060 | -2.468701 | -1.594834 |
| 67 | 6 | 0 | -0.906135 | -3.625942 | -2.381524 |
| 68 | 1 | 0 | -1.672950 | -4.387941 | -2.406413 |
| 69 | 6 | 0 | 0.232890  | -3.776048 | -3.151568 |
| 70 | 1 | 0 | 0.363705  | -4.663634 | -3.760529 |
| 71 | 6 | 0 | 1.187858  | -2.762264 | -3.146888 |
| 72 | 1 | 0 | 2.083409  | -2.813407 | -3.753337 |
| 73 | 6 | 0 | 0.970359  | -1.675992 | -2.316283 |
| 74 | 1 | 0 | 1.696135  | -0.877269 | -2.257008 |
| 75 | 7 | 0 | -2.069917 | -0.000314 | 0.000027  |
| 76 | 7 | 0 | -0.111857 | 1.532638  | 1.532864  |
| 77 | 7 | 0 | -0.111426 | -1.532590 | -1.532710 |
| 78 | 7 | 0 | -3.978867 | 4.265096  | 1.065711  |
| 79 | 7 | 0 | -3.977330 | -4.266558 | -1.064721 |

-----  
 **$E_h = -3747.535260$  Hartree**

## References

- 1 I. Tamgho, J. T. Engle and C. J. Ziegler, *Tetrahedron Lett.*, 2013, **54**, 6114–6117.
- 2 G. M. Sheldrick, *Acta Crystallogr. Sect. A Found. Crystallogr.*, 2008, **64**, 112–122.
- 3 J. Tao, J. P. Perdew, V. N. Staroverov and G. E. Scuseria, *Phys. Rev. Lett.*, 2003, **91**, 146401/1-146401/4.
- 4 J. Tomasi, B. Mennucci and R. Cammi, *Chem. Rev.*, 2005, **105**, 2999–3093.
- 5 A. D. McLean and G. S. Chandler, *J. Chem. Phys.*, 1980, **72**, 5639–5648.
- 6 M. J. Frisch, G. W. Trucks, H. B. Schlegel, G. E. Scuseria, Ma. Robb, J. R. Cheeseman, G. Scalmani, V. Barone, B. Mennucci and G. A. Petersson, *Inc. Wallingford, CT*.
- 7 Tenderholt, Adam L. "QMForge: A Program to Analyze Quantum Chemistry Calculations", Version 3.0, <https://qmforge.net>.
